# Supplementary material for: Genome-Wide Association Study of Age at First Calving in U.S. Holstein Cows
Source: MDPI journal article supplement (doi:10.3390/ijms24087109), 2023-04-12
Supplement: s1 [file Supplementary_material.pdf › Supplementary_material.pdf]

**Table S1.** Basic statistics of AFC phenotypic residuals after removing fixed nongenetic effects from the 12/2021 U.S. Holstein genetic evaluation.

| Trait | Counts | Mean (-days) | Min (-days) | Max (-days) | SD (days) |
|-------|--------|--------------|-------------|-------------|-----------|
| AFC   | 813114 | 12.02        | -405.17     | 363.12      | 46.15     |

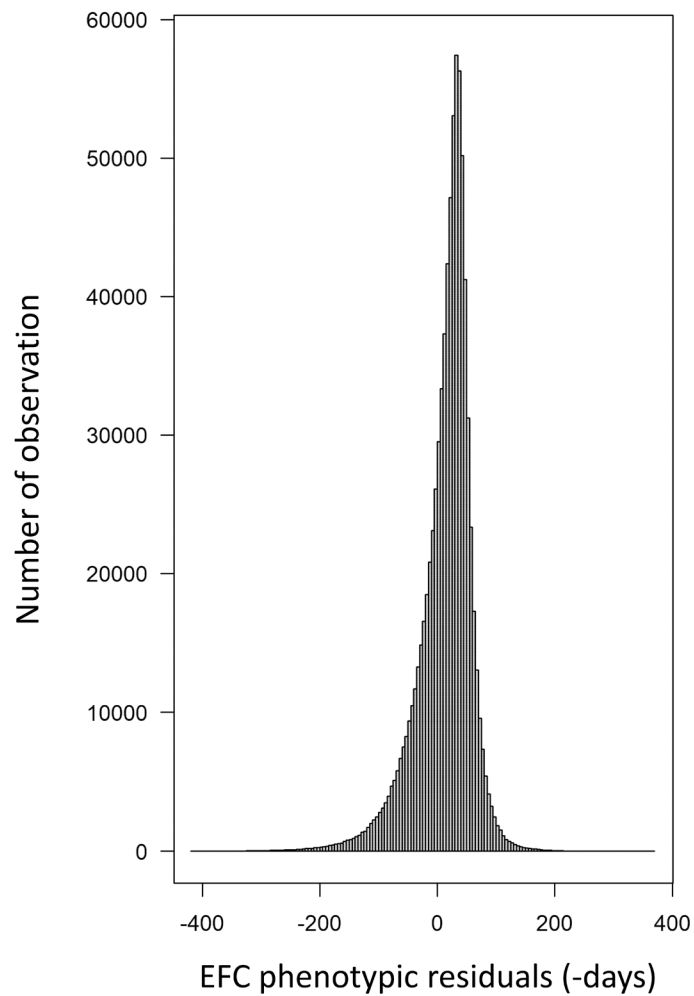

**Figure S1.** Distribution of AFC phenotypic residuals after removing fixed nongenetic effects from the 12/2021 U.S. Holstein genetic evaluation.

**Table S2.** Significant additive effects. (Excel)

**Table S3.** Significant dominance effects. (Excel)

**Table S4.** Average phenotypic values and negative impact of recessive genotypes of seven SNPs.  
(Excel)

**Table S5.** Gene Ontology biological processes of candidate genes with additive effects. (Excel)

**Table S6.** Gene Ontology biological processes of candidate genes with dominance effects. (Excel)
