# Supplementary material for: Genome-Wide Association Study of Age at First Calving in U.S. Holstein Cows
Source: MDPI journal article supplement (doi:10.3390/ijms24087109), 2023-04-12
Supplement: s1 [file Table_S2.xlsx]

## Sheet: table_S2
SNP	Chr	position	Candidate gene	Trait	Test	Effect	log(1/p)	al+	ae+	f_al+	al-	ae-	f_al-	rank
rs110401500	19	31252963	ARHGAP44	efc	a	-1.02402	37.3025	2	0.73	0.287	1	-0.294	0.713	1
rs41257332	19	33443229	TTC19	efc	a	-0.971196	36.4517	2	0.616	0.366	1	-0.355	0.634	2
rs111004845	19	27355811	SHBG 9664bp u	efc	a	-0.970616	36.0579	2	0.648	0.332	1	-0.323	0.668	3
rs135712994	19	33421057	NCOR1	efc	a	-0.889431	33.1449	2	0.359	0.597	1	-0.531	0.403	4
rs110761858	19	33358794	NCOR1	efc	a	-0.8682	31.8656	2	0.354	0.592	1	-0.514	0.408	5
rs41621822	19	31902307	LOC112442639	efc	a	-0.898513	31.3923	2	0.594	0.339	1	-0.304	0.661	6
rs133729181	19	32106657	COX10	efc	a	0.856708	30.4045	1	0.519	0.394	2	-0.337	0.606	7
rs134054295	23	32599962	LOC537017	efc	a	-1.0248	30.3014	2	0.808	0.211	1	-0.217	0.789	8
rs136368496	23	28526405	ENSBTAG00000005146	efc	a	-0.87343	30.0445	2	0.555	0.364	1	-0.318	0.636	9
rs110845473	19	27484633	DNAH2	efc	a	-0.982941	29.8908	2	0.753	0.234	1	-0.23	0.766	10
rs41904669	19	27073319	TNK1	efc	a	0.970594	29.4323	1	0.738	0.239	2	-0.232	0.761	11
rs109836072	15	7475196	TRPC6 3151 bp d	efc	a	-1.03836	29.3815	2	0.818	0.212	1	-0.22	0.788	12
rs137457305	23	26926436	C23H6orf10	efc	a	0.977151	29.2802	1	0.746	0.236	2	-0.231	0.764	13
rs41904556	19	27316118	MPDU1	efc	a	0.9629	29.0275	1	0.732	0.24	2	-0.231	0.76	14
rs42688274	19	29273714	GAS7 22,315 bp d	efc	a	-0.967451	29.0275	2	0.74	0.235	1	-0.227	0.765	15
rs29010491	23	30176828	U6-ENSBTAG00000051232	efc	a	0.808512	28.0279	1	0.442	0.453	2	-0.366	0.547	16
rs137317833	23	29958908	ENSBTAG00000047585-ZNF311	efc	a	-0.812949	27.9288	2	0.455	0.441	1	-0.358	0.559	17
rs136764006	15	7861416	PGR	efc	a	0.890289	27.6328	1	0.62	0.303	2	-0.27	0.697	18
rs110654893	23	30013004	ZNF311 5017bp u	efc	a	-0.801013	27.5345	2	0.438	0.453	1	-0.363	0.547	19
rs109681200	23	30377501	ZSCAN31	efc	a	-0.83187	27.3873	2	0.538	0.354	1	-0.294	0.646	20
rs110592271	19	31816939	HS3ST3A1	efc	a	0.818999	27.3383	1	0.511	0.377	2	-0.308	0.623	21
rs133803418	23	27774805	DDX39B-ENSBTAG00000031913	efc	a	-0.822075	26.4643	2	0.539	0.344	1	-0.283	0.656	22
rs42617560	19	35925135	WFIKKN2-ENSBTAG00000042852	efc	a	0.776976	26.1281	1	0.399	0.486	2	-0.378	0.514	23
rs41643531	19	33855480	ULK2	efc	a	0.831617	25.7941	1	0.575	0.308	2	-0.256	0.692	24
rs109908747	23	29018391	LOC786987	efc	a	0.772473	25.6516	1	0.362	0.531	2	-0.41	0.469	25
rs110928156	19	32751602	HS3ST3B1-PMP22	efc	a	0.774136	25.5568	1	0.334	0.568	2	-0.44	0.432	26
rs110559631	23	26968889	C23H6orf10	efc	a	-0.797688	24.9917	2	0.512	0.358	1	-0.286	0.642	27
rs29015945	19	35808547	SPAG9-ENSBTAG00000049579	efc	a	0.753717	24.7115	1	0.35	0.535	2	-0.403	0.465	28
rs136146234	19	33738493	U6-AKAP10	efc	a	-0.76032	24.248	2	0.466	0.388	1	-0.295	0.612	29
rs110886371	19	35152019	USP22-ENSBTAG00000054465	efc	a	-0.746565	24.248	2	0.366	0.51	1	-0.381	0.49	30
rs132932114	19	21736086	ABR	efc	a	-0.767471	24.1098	2	0.439	0.428	1	-0.329	0.572	31
rs109993655	19	36204759	MYCBPAP	efc	a	0.831344	23.9719	1	0.604	0.273	2	-0.227	0.727	32
rs137047807	23	31309388	PRSS16	efc	a	0.794415	23.8345	1	0.538	0.322	2	-0.256	0.678	33
rs134975091	23	28785343	TRIM26	efc	a	0.740393	23.5608	1	0.393	0.469	2	-0.347	0.531	34
rs41905751	19	28185868	MYH10-U6	efc	a	-0.847311	23.3792	2	0.635	0.25	1	-0.212	0.75	35
rs41911772	19	34170903	EPN2-GRAP	efc	a	0.785528	23.1982	1	0.248	0.684	2	-0.538	0.316	36
rs108982226	19	19727473	NLK	efc	a	-0.880126	23.063	2	0.666	0.243	1	-0.214	0.757	37
rs41658553	1	89373359	U6-ENSBTAG00000050198	efc	a	0.856723	23.018	1	0.205	0.76	2	-0.651	0.24	38
rs41616412	15	7512335	TRPC6-PGR	efc	a	0.885113	22.9731	1	0.693	0.217	2	-0.192	0.783	39
rs133756565	19	32642406	HS3ST3B1-PMP22	efc	a	-0.732405	22.6106	2	0.348	0.524	1	-0.384	0.476	40
rs110120692	19	21698956	ABR	efc	a	-0.764473	22.517	2	0.507	0.336	1	-0.257	0.664	41
rs109836032	19	33581205	SPECC1	efc	a	0.764805	22.4415	1	0.517	0.324	2	-0.248	0.676	42
rs41257257	19	35125080	USP22	efc	a	-0.759478	22.0655	2	0.503	0.337	1	-0.256	0.663	43
rs41642717	19	29376152	MYH13-ENSBTAG00000053276	efc	a	-0.741646	22.0039	2	0.422	0.431	1	-0.32	0.569	44
rs136887076	15	8114980	ARHGAP42	efc	a	-0.81428	21.8941	2	0.578	0.29	1	-0.236	0.71	45
rs132807298	15	8114259	ARHGAP42	efc	a	0.81313	21.8283	1	0.578	0.29	2	-0.235	0.71	46
rs134789684	15	8122072	ARHGAP42	efc	a	0.812924	21.8152	1	0.577	0.29	2	-0.235	0.71	47
rs135324863	15	8117683	ARHGAP42	efc	a	0.811439	21.7364	1	0.576	0.29	2	-0.235	0.71	48
rs109265140	19	33518122	SPECC1	efc	a	0.746488	21.6971	1	0.251	0.664	2	-0.496	0.336	49
rs41630079	23	26934192	C23H6orf10	efc	a	-0.7007	21.3404	2	0.335	0.522	1	-0.366	0.478	50
rs136159962	19	28313157	PIK3R6	efc	a	-0.777119	21.2063	2	0.558	0.281	1	-0.219	0.719	51
rs135368132	19	31479267	ENSBTAG00000052541-HS3ST3A1	efc	a	0.710406	21.1976	1	0.39	0.451	2	-0.32	0.549	52
rs43719233	19	40886021	KRT222-KRT24	efc	a	0.810405	21.1717	1	0.611	0.246	2	-0.199	0.754	53
rs135860109	7	20153088	ZFR2	efc	a	-0.785799	21.1243	2	0.212	0.731	1	-0.574	0.269	54
rs41906514	19	28371404	PIK3R5	efc	a	0.720811	21.1028	1	0.383	0.468	2	-0.338	0.532	55
rs110306848	19	39431931	CWC25-C19H17orf98	efc	a	0.725325	21.0468	1	0.272	0.625	2	-0.453	0.375	56
rs110855962	23	28560191	BOLA-NC1 7102bp d	efc	a	0.69727	21.021	1	0.341	0.511	2	-0.356	0.489	57
rs110474527	7	12474913	LYL1	efc	a	-0.777677	20.8921	2	0.566	0.273	1	-0.212	0.727	58
rs41911744	19	34281894	PRPSAP2	efc	a	-0.734165	20.8921	2	0.482	0.344	1	-0.252	0.656	59
rs137088206	7	12856974	MAN2B1-ENSBTAG00000016721	efc	a	-0.716116	20.8579	2	0.438	0.388	1	-0.278	0.612	60
rs41912091	19	27421507	DNAH2	efc	a	0.746508	20.7424	1	0.503	0.327	2	-0.244	0.673	61
rs110902834	19	28329783	PIK3R6	efc	a	0.699102	20.6698	1	0.373	0.466	2	-0.326	0.534	62
rs133749693	19	22274571	RFLNB-ENSBTAG00000046148	efc	a	0.752281	20.5676	1	0.514	0.317	2	-0.239	0.683	63
rs109739092	19	33626697	SPECC1	efc	a	-0.69391	20.4401	2	0.29	0.581	1	-0.403	0.419	64
rs135416772	23	23660397	ENSBTAG00000053324-PKHD1	efc	a	-0.704915	20.3808	2	0.406	0.424	1	-0.299	0.576	65
rs41653950	4	117770193	ENSBTAG00000054159-ENSBTAG00000052920	efc	a	0.694323	20.2708	1	0.409	0.411	2	-0.286	0.589	66
rs43372690	3	120020055	GPR35	efc	a	-1.0908	20.2666	2	0.12	0.89	1	-0.971	0.11	67
rs110469756	7	12522228	NFIX	efc	a	0.724992	20.2666	1	0.484	0.333	2	-0.241	0.667	68
rs110171642	5	103186163	PEX5	efc	a	-0.713117	20.1274	2	0.466	0.347	1	-0.247	0.653	69
rs41589695	26	31085230	DUSP5-SMC3	efc	a	-0.848629	20.0601	2	0.679	0.2	1	-0.17	0.8	70
rs136732275	23	27287156	TNXB	efc	a	-0.734115	19.9301	2	0.509	0.307	1	-0.225	0.693	71
rs42047284	3	119842963	ENSBTAG00000051719-ENSBTAG00000049314	efc	a	1.05858	19.9008	1	0.124	0.883	2	-0.934	0.117	72
rs109786592	23	21189139	PTCHD4-OR9G1	efc	a	-0.696845	19.8715	2	0.377	0.459	1	-0.32	0.541	73
rs137357048	26	43877138	ENSBTAG00000049849-OAT	efc	a	0.72726	19.8715	1	0.483	0.336	2	-0.245	0.664	74
rs110609912	23	23745977	ENSBTAG00000053324-PKHD1	efc	a	0.712835	19.7837	1	0.29	0.592	2	-0.422	0.408	75
rs110969029	19	36225144	MYCBPAP	efc	a	-0.677923	19.7754	2	0.313	0.538	1	-0.365	0.462	76
rs43508986	7	21593442	CCNI2	efc	a	-0.675509	19.6546	2	0.297	0.56	1	-0.378	0.44	77
rs136015994	19	32995045	TVP23B-ENSBTAG00000048771	efc	a	0.692343	19.4636	1	0.258	0.627	2	-0.434	0.373	78
rs109357328	19	33556351	SPECC1	efc	a	-0.686068	19.4595	2	0.293	0.573	1	-0.393	0.427	79
rs41910972	19	37237738	LOC112442650	efc	a	-0.685508	19.4305	2	0.277	0.596	1	-0.409	0.404	80
rs41657957	7	20476338	NFIC	efc	a	0.768806	19.4016	1	0.193	0.749	2	-0.576	0.251	81
rs110377572	23	28464976	TRIM39	efc	a	0.679122	19.1502	1	0.289	0.574	2	-0.39	0.426	82
rs137603213	19	19637929	ENSBTAG00000048943-NLK	efc	a	0.694968	18.974	1	0.383	0.448	2	-0.312	0.552	83
rs110095569	7	20074017	NMRK2-ATCAY	efc	a	-0.765716	18.925	2	0.19	0.752	1	-0.576	0.248	84
rs108983805	7	13931581	LOC787383	efc	a	-0.734662	18.8475	2	0.53	0.279	1	-0.205	0.721	85
rs110740382	19	31974469	HS3ST3A1-COX10	efc	a	-0.673899	18.8108	2	0.348	0.483	1	-0.326	0.517	86
rs132666769	7	14305241	LOC100139345	efc	a	0.722019	18.6808	1	0.473	0.345	2	-0.249	0.655	87
rs110719761	14	42029950	IL7-ENSBTAG00000042141	efc	a	0.774655	18.6564	1	0.182	0.765	2	-0.593	0.235	88
rs42252297	8	18677218	TUSC1-7SK	efc	a	-0.657361	18.5673	2	0.306	0.535	1	-0.352	0.465	89
rs109654307	23	23563209	ENSBTAG00000053324(d)	efc	a	-0.653623	18.5269	2	0.305	0.534	1	-0.349	0.466	90
rs41640967	19	19419247	NOS2	efc	a	0.751532	18.4865	1	0.56	0.255	2	-0.192	0.745	91
rs109033546	19	20472697	MYO18A	efc	a	-0.651259	18.3656	2	0.332	0.49	1	-0.319	0.51	92
none	19	41168618	KRT39	efc	a	-0.801355	18.3616	2	0.615	0.232	1	-0.186	0.768	93
rs110807783	19	39471733	LASP1	efc	a	-0.70986	18.3334	2	0.5	0.296	1	-0.21	0.704	94
rs137002626	23	23436672	TFAP2B-ENSBTAG00000053324	efc	a	0.673218	18.3053	1	0.264	0.608	2	-0.409	0.392	95
rs42938737	15	10936002	blank	efc	a	-0.708218	18.173	2	0.496	0.3	1	-0.212	0.7	96
rs136017711	19	33456604	TTC19	efc	a	0.723236	18.137	1	0.196	0.729	2	-0.527	0.271	97
rs43560995	23	23825687	ENSBTAG00000053324-PKHD1	efc	a	-0.685249	18.089	2	0.425	0.379	1	-0.26	0.621	98
rs43102403	13	47072638	PRNP-PRND	efc	a	-0.928544	18.0252	2	0.799	0.14	1	-0.13	0.86	99
rs42331883	15	61287744	MPPED2	efc	a	-0.703369	18.0252	2	0.469	0.333	1	-0.234	0.667	100
‘u’ indicates the SNP is upstream of the gene, and ‘d’ indicates the SNP is downstream of the gene.
‘effect’ is the additive effect of the SNP as the difference between allelic effects of ‘allele 1’ and ‘allele 2’ (Equation 10).
‘ae+’ is the allelic effect of the positive allele (Equation 11).
‘ae-’ is the allelic effect of the negative allele (Equation 11).
‘f_al+’ is the frequency of the positive allele. ‘f_al-’ is the requency of the negative allele.
