# Supplementary material for: Genome-Wide Association Study of Age at First Calving in U.S. Holstein Cows
Source: MDPI journal article supplement (doi:10.3390/ijms24087109), 2023-04-12
Supplement: s1 [file Table_S3.xlsx]

## Sheet: table_s3
SNP	Chr	position	Candidate gene	Trait	Test	Effect	log(1/p)	DR	d_DR	f_DR	DD	d_DD	f_DD	RR	d_RR	f_RR	f_R	rank
rs109438971	5	26964045	EIF4B 14636 bp d	efc	d	5.5273	45.0817	12	0.622	0.152	22	-0.0552	0.843	11	-9.76	0.0049	0.081	1
rs110558219	5	26715326	AAAS	efc	d	5.51128	44.894	12	0.622	0.152	11	-0.0553	0.843	22	-9.72	0.00492	0.081	2
rs43768813	6	101887271	AFF1	efc	d	4.86952	33.3606	12	0.605	0.131	22	-0.0456	0.864	11	-8.48	0.00471	0.07	3
rs42739334	6	102065812	KLHL8	efc	d	4.6804	33.0374	12	0.604	0.136	11	-0.0474	0.859	22	-8.11	0.00509	0.073	4
rs109675908	5	26499453	ATF7	efc	d	3.88001	30.7666	12	0.536	0.17	22	-0.0545	0.823	11	-6.63	0.00699	0.092	5
rs43480825	6	101994654	AFF1	efc	d	4.56827	30.5594	12	0.572	0.135	11	-0.0444	0.86	22	-7.95	0.0049	0.072	6
rs109933750	6	102164971	U6 16972 bp (d)	efc	d	4.49655	29.179	12	0.559	0.134	22	-0.0431	0.861	11	-7.83	0.00483	0.072	7
rs135494774	5	25556149	NCKAP1L	efc	d	3.46063	27.3383	12	0.53	0.18	11	-0.0582	0.811	22	-5.8	0.00836	0.099	8
rs134764130	5	26385947	ATP5MC2-ENSBTAG00000042310	efc	d	3.13516	26.1281	12	0.513	0.192	22	-0.061	0.798	11	-5.18	0.00962	0.106	9
rs41603412	5	33076713	PCED1B	efc	d	3.17254	25.5568	12	0.502	0.185	22	-0.0571	0.806	11	-5.28	0.00887	0.101	10
rs43432420	5	32494404	HDAC7	efc	d	3.18608	23.4245	12	0.484	0.179	11	-0.053	0.812	22	-5.35	0.00818	0.098	11
rs109198868	5	32814326	RPAP3-ENSBTAG00000038027	efc	d	2.58402	21.2581	12	0.466	0.204	22	-0.0599	0.785	11	-4.18	0.0114	0.113	12
rs110384471	5	23955328	PLXNC1	efc	d	3.55998	20.4698	12	0.438	0.152	11	-0.0388	0.843	22	-6.21	0.00545	0.081	13
rs41655905	5	28281394	U6-SLC4A8	efc	d	2.08477	20.0433	12	0.454	0.243	11	-0.0737	0.74	22	-3.19	0.0175	0.139	14
rs137220930	5	31351031	ENSBTAG00000038290-ENSBTAG00000007706	efc	d	2.67909	19.0846	12	0.44	0.189	11	-0.0512	0.802	22	-4.43	0.0095	0.104	15
rs111023007	4	23542497	U6-ENSBTAG00000054772	efc	d	4.28818	19.0395	12	0.427	0.119	11	-0.0287	0.878	22	-7.69	0.00334	0.063	16
rs110911638	5	31302765	ENSBTAG00000051046-ENSBTAG00000038290	efc	d	2.65032	18.8923	12	0.436	0.189	11	-0.0508	0.802	22	-4.38	0.00953	0.104	17
rs29023731	4	23863959	AGMO	efc	d	3.53982	14.9532	12	0.381	0.127	22	-0.0274	0.869	11	-6.29	0.00388	0.067	18
rs133163186	5	28101768	SCN8A	efc	d	1.41294	12.921	12	0.384	0.286	11	-0.0794	0.686	22	-1.98	0.028	0.171	19
rs42845770	5	32777212	RPAP3-ENSBTAG00000038027	efc	d	1.60286	12.8433	12	0.374	0.253	11	-0.0645	0.727	22	-2.39	0.0199	0.146	20
rs110457668	5	26822206	CSAD	efc	d	1.43399	12.0397	12	0.354	0.271	22	-0.0677	0.706	11	-2.09	0.0231	0.159	21
rs137681062	8	76684305	FRMD3	efc	d	2.11474	11.4012	12	0.365	0.17	22	-0.0378	0.821	11	-3.46	0.00894	0.094	22
rs136770662	5	27779720	KRT80-ENSBTAG00000048888	efc	d	1.47459	10.678	12	0.341	0.25	22	-0.0578	0.73	11	-2.21	0.0196	0.145	23
rs110248417	8	77960968	NTRK2	efc	d	2.21387	10.233	12	0.348	0.153	11	-0.0317	0.84	22	-3.7	0.00717	0.084	24
rs110249413	5	25527614	PDE1B	efc	d	1.18861	10.0768	12	0.327	0.296	22	-0.0713	0.675	11	-1.65	0.0294	0.177	25
rs42910197	4	34161540	LOC101904927	efc	d	2.09602	9.6884	12	0.314	0.169	22	-0.032	0.824	11	-3.53	0.00754	0.092	26
rs109946186	6	102066326	KLHL8	efc	d	1.49267	9.6063	12	0.326	0.225	11	-0.048	0.759	22	-2.28	0.0161	0.129	27
rs109530721	5	25554959	NCKAP1L	efc	d	0.987645	8.2481	12	0.298	0.321	22	-0.0738	0.642	11	-1.31	0.0369	0.197	28
rs132829254	5	41158104	SLC2A13	efc	d	1.48273	8.062	12	0.293	0.217	11	-0.0416	0.77	22	-2.34	0.0135	0.878	29
’u’ indicates the SNP is upstream of the gene, and ‘d’ indicates the SNP is downstream of the gene.
‘effect’ is the dominance effect of the SNP as the difference between the heterozygous dominance value and the average of the two homozygous dominance values (Equation 12).
‘d_DR’ is the dominance value of the heterozygous genotype with one dominant allele (D) and one recessive allele (R) (Equation 13).
‘DR’ is the heterozygous genotype with one dominant allele and one recessive allele.
‘d_DR’ is the dominance value of the heterozygous genotype with one dominant allele (D) and one recessive allele (R) (Equation 13).
‘DD’ is the homozygous genotype with two dominant alleles.
‘d_DD’ is the dominance value of the homozygous genotype with two dominant alleles (DD) (Equation 13).
‘RR’ is the homozygous genotype with two recessive alleles.
‘d_RR’ is the dominance value of the homozygous genotype with two recessive alleles (RR) (Equation 13).
‘f_DR’ is the frequency of the heterozygous genotype.
‘f_DD’ is the frequency of the homozygous genotype of the dominant allele.
‘f_RR’ is the frequency of the homozygous genotype of the recessive allele. ‘f_R’ is the frequency of the recessive allele.
'f_R' is frequency of the recessive allele.
