# Supplementary material for: Genome-Wide Association Study of Age at First Calving in U.S. Holstein Cows
Source: MDPI journal article supplement (doi:10.3390/ijms24087109), 2023-04-12
Supplement: s1 [file Table_S4.xlsx]

## Sheet: Table_S4
rs_num	Chr	position	Gene_1Mb	Trait	Test	Effect	t-value	log(1/p)	uall	u_s	u1	u2	g11	g12	g22	y11	y12	y22	n11	n12	n22	dl++	de++	f_dl++	dl+-	de+-	f_dl+-	dl--	de--	f_dl--	al+	ae+	f_al+	al-	ae-	f_al-	Negative impact
rs109675908	5	26499453	ATF7	AFC	d	3.81902	11.2	28.2762	11.9919	12.0192	11.5155	12.0704	4.482	12.094	12.0679	5.45185	13.1528	13.1288	5274	128255	619147	12	0.527	0.17	22	-0.0536	0.823	11	-6.53	0.00701	2	0.0512	0.908	1	-0.504	0.0922	-7.68894
rs110558219	5	26715326	AAAS	AFC	d	5.42312	13.53	41.0416	11.9919	12.0145	12.052	11.5892	12.0355	12.2345	1.58717	13.0954	13.2995	2.4469	633926	114484	3693	12	0.608	0.152	11	-0.054	0.843	22	-9.58	0.00491	1	0.0375	0.919	2	-0.425	0.081	-10.7506
rs109438971	5	26964045	EIF4B_KRT18	AFC	d	5.43644	13.55	41.1613	11.9919	12.019	11.5744	12.0582	1.52715	12.2217	12.0434	2.39669	13.2899	13.1027	3687	114449	634660	12	0.608	0.152	22	-0.0539	0.843	11	-9.6	0.0049	2	0.0391	0.919	1	-0.445	0.0809	-10.7996
rs43768813	6	101887271	AFF1	AFC	d	4.70852	11.43	29.4323	11.9919	12.0144	10.9606	12.094	1.7021	11.6244	12.1296	0.0268146	11.6926	13.3552	3541	98782	651012	12	0.584	0.131	22	-0.044	0.864	11	-8.2	0.0047	2	0.0796	0.93	1	-1.05	0.0703	-12.4971
rs43480825	6	101994654	AFF1	AFC	d	4.39264	10.9	26.8025	11.9919	12.0154	12.0968	10.9747	12.1353	11.6063	2.29207	13.3646	11.6913	0.525378	647956	101864	3705	12	0.55	0.135	11	-0.0428	0.86	22	-7.64	0.00492	1	0.0814	0.927	2	-1.04	0.0725	-12.0026
rs42739334	6	102065812	KLHL8	AFC	d	4.61522	11.61	30.3529	11.9919	12.0133	12.0969	10.9535	12.1337	11.631	1.89789	13.389	11.6025	-0.330317	645619	102170	3822	12	0.594	0.136	11	-0.0467	0.859	22	-8	0.00509	1	0.0835	0.927	2	-1.06	0.0731	-12.8261
rs109933750	6	102164971	U6_HSD17B13	AFC	d	4.32156	10.64	25.5568	11.9919	12.0116	10.98	12.0917	2.42078	11.5971	12.1303	0.764598	11.6991	13.3582	3642	101023	646921	12	0.537	0.134	22	-0.0415	0.861	11	-7.53	0.00485	2	0.0801	0.928	1	-1.03	0.0721	-11.764
rs109675908	5	26499453	ATF7	Fat yield	d	6.16306	24.7882	135.385	48.6893	48.8097	48.5689	48.8342	37.8213	49.4584	48.7695	37.751	56.5555	59.2204	5125	123842	597087	12	0.865	0.171	22	-0.0892	0.822	11	-10.5	0.00706	2	0.0245	0.908	1	-0.241	0.0923	-20.137
rs110558219	5	26715326	AAAS	Fat yield	d	8.84397	30.2685	200.712	48.6893	48.8063	48.8302	48.5353	48.7638	49.5647	32.6776	59.0899	56.8284	31.9318	611371	110544	3588	12	1.01	0.152	11	-0.0903	0.843	22	-15.6	0.00495	1	0.0239	0.919	2	-0.271	0.0811	-26.0274
rs109438971	5	26964045	EIF4B_KRT18	Fat yield	d	8.85282	30.2729	200.77	48.6893	48.8085	48.521	48.8338	32.6273	49.551	48.7691	31.9251	56.827	59.0894	3581	110511	612084	12	1	0.152	22	-0.0901	0.843	11	-15.6	0.00493	2	0.0253	0.919	1	-0.287	0.081	-26.0331
rs43768813	6	101887271	AFF1	Fat yield	d	0.0626685	0.208374	0.011	48.6893	48.8042	47.9876	48.866	47.0561	48.0546	48.9277	47.6352	54.005	59.3669	3431	95470	627788	12	0.00511	0.131	22	-0.000148	0.864	11	-0.115	0.00472	2	0.0618	0.93	1	-0.817	0.0704	-9.05072
rs43480825	6	101994654	AFF1	Fat yield	d	0.0763398	0.259376	0.0169	48.6893	48.8052	48.8727	47.9442	48.94	48.0173	46.9419	59.4505	53.6777	46.6819	624852	98427	3590	12	0.00567	0.135	11	-8.08e-05	0.86	22	-0.141	0.00494	1	0.0674	0.927	2	-0.861	0.0726	-9.88219
rs42739334	6	102065812	KLHL8	Fat yield	d	0.101739	0.350468	0.0306	48.6893	48.8068	48.8774	47.9129	48.9475	47.9937	46.8365	59.5222	53.5234	46.0272	622577	98734	3705	12	0.0102	0.136	11	-0.000529	0.859	22	-0.183	0.00511	1	0.0706	0.927	2	-0.894	0.0732	-10.4956
rs109933750	6	102164971	U6_HSD17B13	Fat yield	d	0.361703	1.21803	0.3564	48.6893	48.808	48.0216	48.8691	46.5978	48.1243	48.9274	46.4752	53.9514	59.4392	3522	97607	623863	12	0.0416	0.135	22	-0.00291	0.861	11	-0.637	0.00486	2	0.0612	0.928	1	-0.786	0.0722	-10.2201
rs109675908	5	26499453	ATF7	Milk yield	d	169.678	25.3297	141.278	1406.61	1409.98	1408.74	1410.11	1118.43	1432.77	1407.76	1113.56	1568.76	1598.47	5125	123842	597087	12	23.9	0.171	22	-2.48	0.822	11	-289	0.00706	2	0.126	0.908	1	-1.24	0.0923	-470.058
rs110558219	5	26715326	AAAS	Milk yield	d	244.093	31.0053	210.458	1406.61	1409.95	1410.11	1408.1	1407.76	1436.13	976.312	1597.11	1571.81	938.133	611371	110544	3588	12	27.9	0.152	11	-2.52	0.843	22	-430	0.00495	1	0.163	0.919	2	-1.85	0.0811	-646.327
rs109438971	5	26964045	EIF4B_KRT18	Milk yield	d	242.571	30.7875	207.553	1406.61	1409.97	1408	1410.14	978.673	1435.82	1407.83	943.528	1571.95	1596.98	3581	110511	612084	12	27.6	0.152	22	-2.49	0.843	11	-427	0.00493	2	0.174	0.919	1	-1.97	0.081	-640.938
rs43768813	6	101887271	AFF1	Milk yield	d	1.09029	0.134549	0.0046	1406.61	1409.86	1393.84	1411.08	1375.8	1395.13	1412.29	1383.11	1500.31	1604.6	3431	95470	627788	12	0.0828	0.131	22	-0.00158	0.864	11	-2.01	0.00472	2	1.21	0.93	1	-16	0.0704	-169.347
rs43480825	6	101994654	AFF1	Milk yield	d	2.46008	0.310223	0.024	1406.61	1409.89	1411.22	1392.92	1412.53	1394.48	1371.51	1606.35	1493.4	1360.1	624852	98427	3590	12	0.233	0.135	11	-0.0111	0.86	22	-4.44	0.00494	1	1.33	0.927	2	-17	0.0726	-189.777
rs42739334	6	102065812	KLHL8	Milk yield	d	5.72444	0.731867	0.1306	1406.61	1409.9	1411.42	1390.62	1412.9	1392.82	1361.29	1608.83	1485.16	1306.15	622577	98734	3705	12	0.678	0.136	11	-0.0478	0.859	22	-10	0.00511	1	1.52	0.927	2	-19.3	0.0732	-240.842
rs109933750	6	102164971	U6_HSD17B13	Milk yield	d	11.1855	1.39797	0.4676	1406.61	1409.94	1394.64	1411.13	1359.72	1397.16	1412.22	1352.36	1501.41	1605.77	3522	97607	623863	12	1.33	0.135	22	-0.0973	0.861	11	-19.6	0.00486	2	1.19	0.928	1	-15.3	0.0722	-201.228
rs109675908	5	26499453	ATF7	Protein yield	d	5.06233	27.2755	163.469	41.9052	41.9542	42.0483	41.9446	33.5225	42.7539	41.8607	34.9839	48.8801	49.5328	5125	123842	597087	12	0.715	0.171	22	-0.0744	0.822	11	-8.62	0.00706	1	0.0941	0.0923	2	-0.00957	0.908	-14.2226
rs110558219	5	26715326	AAAS	Protein yield	d	7.31975	33.5589	245.992	41.9052	41.9532	41.943	42.0685	41.8568	42.8975	29.2987	49.4567	49.1813	30.0471	611371	110544	3588	12	0.839	0.152	11	-0.0761	0.843	22	-12.9	0.00495	2	0.115	0.0811	1	-0.0102	0.919	-19.2719
rs109438971	5	26964045	EIF4B_KRT18	Protein yield	d	7.266	33.286	242.064	41.9052	41.9534	42.0639	41.9436	29.3811	42.8858	41.8586	30.2075	49.189	49.4518	3581	110511	612084	12	0.832	0.152	22	-0.0753	0.843	11	-12.8	0.00493	1	0.111	0.081	2	-0.00974	0.919	-19.113
rs43768813	6	101887271	AFF1	Protein yield	d	-0.0502736	0.223899	0.0126	41.9052	41.9506	41.6029	41.9769	41.3403	41.6218	42.0039	42.2927	46.2141	49.8248	3431	95470	627788	11	0.085	0.00472	22	0.000669	0.864	12	-0.00745	0.131	2	0.0263	0.93	1	-0.348	0.0704	-5.72671
rs43480825	6	101994654	AFF1	Protein yield	d	-0.00426304	0.0194008	0.0001	41.9052	41.9515	41.9818	41.5637	42.0125	41.5918	41.1795	49.884	45.9799	41.5369	624852	98427	3590	22	0.00349	0.00494	11	0.000349	0.86	12	-0.00234	0.135	1	0.0304	0.927	2	-0.388	0.0726	-6.39512
rs42739334	6	102065812	KLHL8	Protein yield	d	0.0866793	0.399927	0.0397	41.9052	41.9516	41.9879	41.492	42.0236	41.538	40.8791	49.9543	45.7657	40.4504	622577	98734	3705	12	0.0097	0.136	11	-0.000626	0.859	22	-0.153	0.00511	1	0.0363	0.927	2	-0.46	0.0732	-7.40964
rs109933750	6	102164971	U6_HSD17B13	Protein yield	d	0.220247	0.993393	0.2385	41.9052	41.9528	41.6128	41.9793	40.8862	41.6653	42.0038	41.288	46.1813	49.8755	3522	97607	623863	12	0.026	0.135	22	-0.00188	0.861	11	-0.387	0.00486	2	0.0264	0.928	1	-0.34	0.0722	-6.74042
‘u’ indicates the SNP is upstream of the gene, and ‘d’ indicates the SNP is downstream of the gene.
’uall‘ = mean of all SNP genotypic values.
’u_s‘ = mean of all genotypic values of the SNP (Equation 8).
’ui‘ = allelic mean of all genotypes containing the ith allele of the SNP, i=1,2 (Equations 6 and 7).
’gij‘ = SNP genotypic value of the ij genotype (i,j=1,2) calculated from the phenotypic residuals after removing the estimated breeding values (Equation 1)
’yij‘ = average phenotypic values of the ij genotype (i,j=1,2) calculated from the original phenotypic residuals without removing the estimated breeding values
’nij’ = number of cows with the ij genotype (i,j=1,2)
dl++ = genotype with the highest dominance value.
de++ = dominance value of the dl++ genotype.
f_dl++ = frequency of the dl++ genotype.
dl+- = genotype with the second highest dominance value.
de+- = dominance value of the dl+- genotype.
f_dl+- = frequency of the dl+- genotype.
dl-- = genotype with the lowest dominance value.
de-- = dominance value of the dl+- genotype.
f_dl-- = frequency of the dl-- genotype.
