# Supplementary material for: Genome-Wide Association Study of Age at First Calving in U.S. Holstein Cows
Source: MDPI journal article supplement (doi:10.3390/ijms24087109), 2023-04-12
Supplement: s1 [file Table_S5.xlsx]

## Sheet: table_s5
GO ID	Description of GO ID	out (12)	All (17045)	pvalue	p.adjust	Genes	Gene_Symbol
GO:0035021	negative regulation of Rac protein signal transduction	1	3	0.00211069	0.118199	ENSBTAG00000021938	ARHGAP44
GO:0035020	regulation of Rac protein signal transduction	1	16	0.0112099	0.166734	ENSBTAG00000021938	ARHGAP44
GO:0061001	regulation of dendritic spine morphogenesis	1	19	0.0132989	0.166734	ENSBTAG00000021938	ARHGAP44
GO:0016601	Rac protein signal transduction	1	31	0.0216145	0.175422	ENSBTAG00000021938	ARHGAP44
GO:0060997	dendritic spine morphogenesis	1	33	0.0229942	0.175422	ENSBTAG00000021938	ARHGAP44
GO:0060998	regulation of dendritic spine development	1	35	0.024372	0.175422	ENSBTAG00000021938	ARHGAP44
GO:0046580	negative regulation of Ras protein signal transduction	1	41	0.028495	0.176051	ENSBTAG00000021938	ARHGAP44
GO:0097061	dendritic spine organization	1	43	0.0298658	0.176051	ENSBTAG00000021938	ARHGAP44
GO:0048814	regulation of dendrite morphogenesis	1	45	0.0312348	0.180325	ENSBTAG00000021938	ARHGAP44
GO:0051058	negative regulation of small GTPase mediated signal transduction	1	47	0.032602	0.184415	ENSBTAG00000021938	ARHGAP44
GO:0060996	dendritic spine development	1	53	0.0366931	0.197578	ENSBTAG00000021938	ARHGAP44
GO:0048813	dendrite morphogenesis	1	81	0.0555759	0.221414	ENSBTAG00000021938	ARHGAP44
GO:0050773	regulation of dendrite development	1	82	0.056244	0.221414	ENSBTAG00000021938	ARHGAP44
GO:0016358	dendrite development	1	142	0.0955443	0.264875	ENSBTAG00000021938	ARHGAP44
GO:0046578	regulation of Ras protein signal transduction	1	158	0.105768	0.27295	ENSBTAG00000021938	ARHGAP44
GO:0051056	regulation of small GTPase mediated signal transduction	1	185	0.12278	0.295095	ENSBTAG00000021938	ARHGAP44
GO:0007265	Ras protein signal transduction	1	264	0.170868	0.344195	ENSBTAG00000021938	ARHGAP44
GO:0010769	regulation of cell morphogenesis involved in differentiation	1	267	0.172646	0.345292	ENSBTAG00000021938	ARHGAP44
GO:0032956	regulation of actin cytoskeleton organization	1	283	0.182067	0.351252	ENSBTAG00000021938	ARHGAP44
GO:0043547	positive regulation of GTPase activity	1	293	0.187906	0.351264	ENSBTAG00000021938	ARHGAP44
GO:0010975	regulation of neuron projection development	1	301	0.192549	0.351264	ENSBTAG00000021938	ARHGAP44
GO:0032970	regulation of actin filament-based process	1	307	0.196015	0.351264	ENSBTAG00000021938	ARHGAP44
GO:0043087	regulation of GTPase activity	1	350	0.220461	0.371862	ENSBTAG00000021938	ARHGAP44
GO:0007264	small GTPase mediated signal transduction	1	357	0.224376	0.375076	ENSBTAG00000021938	ARHGAP44
GO:0048667	cell morphogenesis involved in neuron differentiation	1	400	0.248029	0.394592	ENSBTAG00000021938	ARHGAP44
GO:0045664	regulation of neuron differentiation	1	415	0.256123	0.404026	ENSBTAG00000021938	ARHGAP44
GO:0022604	regulation of cell morphogenesis	1	441	0.269965	0.421911	ENSBTAG00000021938	ARHGAP44
GO:0031344	regulation of cell projection organization	1	445	0.272073	0.421911	ENSBTAG00000021938	ARHGAP44
GO:0051493	regulation of cytoskeleton organization	1	450	0.2747	0.421911	ENSBTAG00000021938	ARHGAP44
GO:0051345	positive regulation of hydrolase activity	1	516	0.308579	0.448408	ENSBTAG00000021938	ARHGAP44
GO:0050767	regulation of neurogenesis	1	531	0.316074	0.45385	ENSBTAG00000021938	ARHGAP44
GO:0051960	regulation of nervous system development	1	609	0.353859	0.479809	ENSBTAG00000021938	ARHGAP44
GO:0000904	cell morphogenesis involved in differentiation	1	621	0.359499	0.485108	ENSBTAG00000021938	ARHGAP44
GO:0060284	regulation of cell development	1	694	0.39285	0.520084	ENSBTAG00000021938	ARHGAP44
GO:0022603	regulation of anatomical structure morphogenesis	1	797	0.437202	0.557626	ENSBTAG00000021938	ARHGAP44
GO:0051336	regulation of hydrolase activity	1	942	0.494619	0.600839	ENSBTAG00000021938	ARHGAP44
GO:0043085	positive regulation of catalytic activity	1	963	0.502474	0.603831	ENSBTAG00000021938	ARHGAP44
GO:0033043	regulation of organelle organization	1	1004	0.517488	0.620543	ENSBTAG00000021938	ARHGAP44
GO:0045595	regulation of cell differentiation	1	1259	0.601923	0.68337	ENSBTAG00000021938	ARHGAP44
GO:2000026	regulation of multicellular organismal development	1	1425	0.649365	0.710243	ENSBTAG00000021938	ARHGAP44
GO:0050790	regulation of catalytic activity	1	1812	0.740546	0.784825	ENSBTAG00000021938	ARHGAP44
GO:0050793	regulation of developmental process	1	1893	0.756631	0.796454	ENSBTAG00000021938	ARHGAP44
GO:0051128	regulation of cellular component organization	1	1924	0.762541	0.801169	ENSBTAG00000021938	ARHGAP44
GO:0051239	regulation of multicellular organismal process	1	2160	0.803403	0.828555	ENSBTAG00000021938	ARHGAP44
GO:0048033	heme o metabolic process	1	1	0.000704019	0.118199	ENSBTAG00000015294	COX10
GO:0048034	heme O biosynthetic process	1	1	0.000704019	0.118199	ENSBTAG00000015294	COX10
GO:0006784	heme a biosynthetic process	1	2	0.00140758	0.118199	ENSBTAG00000015294	COX10
GO:0046160	heme a metabolic process	1	2	0.00140758	0.118199	ENSBTAG00000015294	COX10
GO:0006783	heme biosynthetic process	1	16	0.0112099	0.166734	ENSBTAG00000015294	COX10
GO:0006779	porphyrin-containing compound biosynthetic process	1	19	0.0132989	0.166734	ENSBTAG00000015294	COX10
GO:0008535	respiratory chain complex IV assembly	1	22	0.0153839	0.166734	ENSBTAG00000015294	COX10
GO:0033014	tetrapyrrole biosynthetic process	1	22	0.0153839	0.166734	ENSBTAG00000015294	COX10
GO:0042168	heme metabolic process	1	22	0.0153839	0.166734	ENSBTAG00000015294	COX10
GO:0006778	porphyrin-containing compound metabolic process	1	26	0.0181575	0.175422	ENSBTAG00000015294	COX10
GO:0000266	mitochondrial fission	1	33	0.0229942	0.175422	ENSBTAG00000015294	COX10
GO:0033013	tetrapyrrole metabolic process	1	33	0.0229942	0.175422	ENSBTAG00000015294	COX10
GO:0009060	aerobic respiration	1	41	0.028495	0.176051	ENSBTAG00000015294	COX10
GO:0046148	pigment biosynthetic process	1	42	0.0291806	0.176051	ENSBTAG00000015294	COX10
GO:0042440	pigment metabolic process	1	51	0.0353312	0.195795	ENSBTAG00000015294	COX10
GO:0022900	electron transport chain	1	114	0.0773947	0.240784	ENSBTAG00000015294	COX10
GO:0051188	cofactor biosynthetic process	1	115	0.0780487	0.241476	ENSBTAG00000015294	COX10
GO:0045333	cellular respiration	1	119	0.08066	0.245487	ENSBTAG00000015294	COX10
GO:1902600	hydrogen ion transmembrane transport	1	130	0.0878064	0.257443	ENSBTAG00000015294	COX10
GO:0006818	hydrogen transport	1	142	0.0955443	0.264875	ENSBTAG00000015294	COX10
GO:0015992	proton transport	1	142	0.0955443	0.264875	ENSBTAG00000015294	COX10
GO:0015980	energy derivation by oxidation of organic compounds	1	189	0.125275	0.29645	ENSBTAG00000015294	COX10
GO:0048285	organelle fission	1	383	0.238758	0.389809	ENSBTAG00000015294	COX10
GO:0015672	monovalent inorganic cation transport	1	480	0.290284	0.436958	ENSBTAG00000015294	COX10
GO:0055114	oxidation-reduction process	1	767	0.424601	0.549513	ENSBTAG00000015294	COX10
GO:0007018	microtubule-based movement	1	223	0.146222	0.314939	ENSBTAG00000008605	DNAH2
GO:0006928	movement of cell or subcellular component	1	1563	0.684797	0.736058	ENSBTAG00000008605	DNAH2
GO:0007017	microtubule-based process	2	701	0.0848643	0.255505	ENSBTAG00000008605;ENSBTAG00000013271	DNAH2;NCOR1
GO:0030041	actin filament polymerization	1	160	0.107038	0.273706	ENSBTAG00000019107	GAS7
GO:0008154	actin polymerization or depolymerization	1	183	0.12153	0.293349	ENSBTAG00000019107	GAS7
GO:0051258	protein polymerization	1	237	0.154712	0.32571	ENSBTAG00000019107	GAS7
GO:0007015	actin filament organization	1	369	0.231044	0.380543	ENSBTAG00000019107	GAS7
GO:0048812	neuron projection morphogenesis	2	433	0.0359099	0.195795	ENSBTAG00000019107;ENSBTAG00000021938	GAS7;ARHGAP44
GO:0030036	actin cytoskeleton organization	2	569	0.0588412	0.221414	ENSBTAG00000019107;ENSBTAG00000021938	GAS7;ARHGAP44
GO:0030029	actin filament-based process	2	623	0.0690824	0.229284	ENSBTAG00000019107;ENSBTAG00000021938	GAS7;ARHGAP44
GO:0031175	neuron projection development	2	624	0.0692775	0.229284	ENSBTAG00000019107;ENSBTAG00000021938	GAS7;ARHGAP44
GO:0048858	cell projection morphogenesis	2	710	0.0867548	0.257051	ENSBTAG00000019107;ENSBTAG00000021938	GAS7;ARHGAP44
GO:0032990	cell part morphogenesis	2	725	0.0899358	0.259588	ENSBTAG00000019107;ENSBTAG00000021938	GAS7;ARHGAP44
GO:0048666	neuron development	2	769	0.0994756	0.267819	ENSBTAG00000019107;ENSBTAG00000021938	GAS7;ARHGAP44
GO:0030182	neuron differentiation	2	956	0.143013	0.314068	ENSBTAG00000019107;ENSBTAG00000021938	GAS7;ARHGAP44
GO:0048699	generation of neurons	2	1081	0.17424	0.347241	ENSBTAG00000019107;ENSBTAG00000021938	GAS7;ARHGAP44
GO:0000902	cell morphogenesis	2	1095	0.17782	0.348448	ENSBTAG00000019107;ENSBTAG00000021938	GAS7;ARHGAP44
GO:0030030	cell projection organization	2	1095	0.17782	0.348448	ENSBTAG00000019107;ENSBTAG00000021938	GAS7;ARHGAP44
GO:0022008	neurogenesis	2	1166	0.196182	0.351264	ENSBTAG00000019107;ENSBTAG00000021938	GAS7;ARHGAP44
GO:0032989	cellular component morphogenesis	2	1166	0.196182	0.351264	ENSBTAG00000019107;ENSBTAG00000021938	GAS7;ARHGAP44
GO:0007399	nervous system development	2	1580	0.307281	0.448117	ENSBTAG00000019107;ENSBTAG00000021938	GAS7;ARHGAP44
GO:0048468	cell development	3	1642	0.1016	0.270517	ENSBTAG00000019107;ENSBTAG00000021938;ENSBTAG00000024648	GAS7;ARHGAP44;PGR
GO:0009653	anatomical structure morphogenesis	3	2225	0.199376	0.351264	ENSBTAG00000019107;ENSBTAG00000021938;ENSBTAG00000024648	GAS7;ARHGAP44;PGR
GO:0030154	cell differentiation	3	2837	0.321757	0.455256	ENSBTAG00000019107;ENSBTAG00000021938;ENSBTAG00000024648	GAS7;ARHGAP44;PGR
GO:0048869	cellular developmental process	3	3142	0.385757	0.513121	ENSBTAG00000019107;ENSBTAG00000021938;ENSBTAG00000024648	GAS7;ARHGAP44;PGR
GO:0048731	system development	3	3331	0.425412	0.549513	ENSBTAG00000019107;ENSBTAG00000021938;ENSBTAG00000024648	GAS7;ARHGAP44;PGR
GO:0007275	multicellular organism development	3	3643	0.489825	0.599811	ENSBTAG00000019107;ENSBTAG00000021938;ENSBTAG00000024648	GAS7;ARHGAP44;PGR
GO:0048856	anatomical structure development	3	4126	0.584429	0.673417	ENSBTAG00000019107;ENSBTAG00000021938;ENSBTAG00000024648	GAS7;ARHGAP44;PGR
GO:0044767	single-organism developmental process	3	4423	0.63822	0.709133	ENSBTAG00000019107;ENSBTAG00000021938;ENSBTAG00000024648	GAS7;ARHGAP44;PGR
GO:0044707	single-multicellular organism process	3	4450	0.642918	0.710243	ENSBTAG00000019107;ENSBTAG00000021938;ENSBTAG00000024648	GAS7;ARHGAP44;PGR
GO:0032502	developmental process	3	4473	0.646893	0.710243	ENSBTAG00000019107;ENSBTAG00000021938;ENSBTAG00000024648	GAS7;ARHGAP44;PGR
GO:0032501	multicellular organismal process	3	5964	0.848631	0.865635	ENSBTAG00000019107;ENSBTAG00000021938;ENSBTAG00000024648	GAS7;ARHGAP44;PGR
GO:0009312	oligosaccharide biosynthetic process	1	9	0.00631983	0.159545	ENSBTAG00000000134	MPDU1
GO:0006488	dolichol-linked oligosaccharide biosynthetic process	1	13	0.00911688	0.159545	ENSBTAG00000000134	MPDU1
GO:0006490	oligosaccharide-lipid intermediate biosynthetic process	1	15	0.0105127	0.166734	ENSBTAG00000000134	MPDU1
GO:0009311	oligosaccharide metabolic process	1	43	0.0298658	0.176051	ENSBTAG00000000134	MPDU1
GO:0016051	carbohydrate biosynthetic process	1	137	0.0923275	0.262454	ENSBTAG00000000134	MPDU1
GO:1901137	carbohydrate derivative biosynthetic process	1	550	0.32546	0.457934	ENSBTAG00000000134	MPDU1
GO:0044711	single-organism biosynthetic process	2	1168	0.196704	0.351264	ENSBTAG00000000134;ENSBTAG00000015294	MPDU1;COX10
GO:0044763	single-organism cellular process	8	11990	0.732725	0.778993	ENSBTAG00000000134;ENSBTAG00000008605;ENSBTAG00000011227;ENSBTAG00000013271;ENSBTAG00000015294;ENSBTAG00000019107;ENSBTAG00000021938;ENSBTAG00000024648	MPDU1;DNAH2;TRPC6;NCOR1;COX10;GAS7;ARHGAP44;PGR
GO:0044699	single-organism process	8	13205	0.889118	0.898747	ENSBTAG00000000134;ENSBTAG00000008605;ENSBTAG00000011227;ENSBTAG00000013271;ENSBTAG00000015294;ENSBTAG00000019107;ENSBTAG00000021938;ENSBTAG00000024648	MPDU1;DNAH2;TRPC6;NCOR1;COX10;GAS7;ARHGAP44;PGR
GO:0044723	single-organism carbohydrate metabolic process	2	555	0.0562849	0.221414	ENSBTAG00000000134;ENSBTAG00000013271	MPDU1;NCOR1
GO:0005975	carbohydrate metabolic process	2	637	0.0718322	0.230447	ENSBTAG00000000134;ENSBTAG00000013271	MPDU1;NCOR1
GO:0044255	cellular lipid metabolic process	2	825	0.112038	0.276556	ENSBTAG00000000134;ENSBTAG00000013271	MPDU1;NCOR1
GO:1901135	carbohydrate derivative metabolic process	2	947	0.140822	0.313438	ENSBTAG00000000134;ENSBTAG00000013271	MPDU1;NCOR1
GO:0006629	lipid metabolic process	2	1062	0.169407	0.342483	ENSBTAG00000000134;ENSBTAG00000013271	MPDU1;NCOR1
GO:0044710	single-organism metabolic process	3	4142	0.587422	0.675475	ENSBTAG00000000134;ENSBTAG00000013271;ENSBTAG00000015294	MPDU1;NCOR1;COX10
GO:0009987	cellular process	12	15468	0.311799	0.451182	ENSBTAG00000000134;ENSBTAG00000008349;ENSBTAG00000008605;ENSBTAG00000011227;ENSBTAG00000013270;ENSBTAG00000013271;ENSBTAG00000015294;ENSBTAG00000017739;ENSBTAG00000019107;ENSBTAG00000021938;ENSBTAG00000024648;ENSBTAG00000037988	MPDU1;ZNF311;DNAH2;TRPC6;TTC19;NCOR1;COX10;TNK1;GAS7;ARHGAP44;PGR;ZSCAN31
GO:0008150	biological_process	12	17045	1	1	ENSBTAG00000000134;ENSBTAG00000008349;ENSBTAG00000008605;ENSBTAG00000011227;ENSBTAG00000013270;ENSBTAG00000013271;ENSBTAG00000015294;ENSBTAG00000017739;ENSBTAG00000019107;ENSBTAG00000021938;ENSBTAG00000024648;ENSBTAG00000037988	MPDU1;ZNF311;DNAH2;TRPC6;TTC19;NCOR1;COX10;TNK1;GAS7;ARHGAP44;PGR;ZSCAN31
GO:1901576	organic substance biosynthetic process	6	4956	0.103674	0.270517	ENSBTAG00000000134;ENSBTAG00000008349;ENSBTAG00000013271;ENSBTAG00000015294;ENSBTAG00000024648;ENSBTAG00000037988	MPDU1;ZNF311;NCOR1;COX10;PGR;ZSCAN31
GO:0009058	biosynthetic process	6	5038	0.110876	0.276556	ENSBTAG00000000134;ENSBTAG00000008349;ENSBTAG00000013271;ENSBTAG00000015294;ENSBTAG00000024648;ENSBTAG00000037988	MPDU1;ZNF311;NCOR1;COX10;PGR;ZSCAN31
GO:0008152	metabolic process	8	10579	0.497598	0.601847	ENSBTAG00000000134;ENSBTAG00000008349;ENSBTAG00000013271;ENSBTAG00000015294;ENSBTAG00000017739;ENSBTAG00000021938;ENSBTAG00000024648;ENSBTAG00000037988	MPDU1;ZNF311;NCOR1;COX10;TNK1;ARHGAP44;PGR;ZSCAN31
GO:0044237	cellular metabolic process	7	9227	0.502372	0.603831	ENSBTAG00000000134;ENSBTAG00000008349;ENSBTAG00000013271;ENSBTAG00000015294;ENSBTAG00000017739;ENSBTAG00000024648;ENSBTAG00000037988	MPDU1;ZNF311;NCOR1;COX10;TNK1;PGR;ZSCAN31
GO:0071704	organic substance metabolic process	7	9800	0.597103	0.681013	ENSBTAG00000000134;ENSBTAG00000008349;ENSBTAG00000013271;ENSBTAG00000015294;ENSBTAG00000017739;ENSBTAG00000024648;ENSBTAG00000037988	MPDU1;ZNF311;NCOR1;COX10;TNK1;PGR;ZSCAN31
GO:0044238	primary metabolic process	6	9407	0.743753	0.784825	ENSBTAG00000000134;ENSBTAG00000008349;ENSBTAG00000013271;ENSBTAG00000017739;ENSBTAG00000024648;ENSBTAG00000037988	MPDU1;ZNF311;NCOR1;TNK1;PGR;ZSCAN31
GO:0045820	negative regulation of glycolytic process	1	12	0.0084183	0.159545	ENSBTAG00000013271	NCOR1
GO:1903799	negative regulation of production of miRNAs involved in gene silencing by miRNA	1	12	0.0084183	0.159545	ENSBTAG00000013271	NCOR1
GO:0030812	negative regulation of nucleotide catabolic process	1	13	0.00911688	0.159545	ENSBTAG00000013271	NCOR1
GO:0051195	negative regulation of cofactor metabolic process	1	13	0.00911688	0.159545	ENSBTAG00000013271	NCOR1
GO:0051198	negative regulation of coenzyme metabolic process	1	13	0.00911688	0.159545	ENSBTAG00000013271	NCOR1
GO:0060766	negative regulation of androgen receptor signaling pathway	1	14	0.00981501	0.166558	ENSBTAG00000013271	NCOR1
GO:0060965	negative regulation of gene silencing by miRNA	1	15	0.0105127	0.166734	ENSBTAG00000013271	NCOR1
GO:0060149	negative regulation of posttranscriptional gene silencing	1	17	0.0119067	0.166734	ENSBTAG00000013271	NCOR1
GO:0060967	negative regulation of gene silencing by RNA	1	17	0.0119067	0.166734	ENSBTAG00000013271	NCOR1
GO:0046329	negative regulation of JNK cascade	1	19	0.0132989	0.166734	ENSBTAG00000013271	NCOR1
GO:1903798	regulation of production of miRNAs involved in gene silencing by miRNA	1	19	0.0132989	0.166734	ENSBTAG00000013271	NCOR1
GO:0070920	regulation of production of small RNA involved in gene silencing by RNA	1	20	0.0139943	0.166734	ENSBTAG00000013271	NCOR1
GO:0045922	negative regulation of fatty acid metabolic process	1	22	0.0153839	0.166734	ENSBTAG00000013271	NCOR1
GO:0045978	negative regulation of nucleoside metabolic process	1	23	0.0160779	0.166734	ENSBTAG00000013271	NCOR1
GO:0060765	regulation of androgen receptor signaling pathway	1	23	0.0160779	0.166734	ENSBTAG00000013271	NCOR1
GO:1903579	negative regulation of ATP metabolic process	1	23	0.0160779	0.166734	ENSBTAG00000013271	NCOR1
GO:0032873	negative regulation of stress-activated MAPK cascade	1	27	0.0188498	0.175422	ENSBTAG00000013271	NCOR1
GO:0070303	negative regulation of stress-activated protein kinase signaling cascade	1	27	0.0188498	0.175422	ENSBTAG00000013271	NCOR1
GO:0033144	negative regulation of intracellular steroid hormone receptor signaling pathway	1	30	0.020924	0.175422	ENSBTAG00000013271	NCOR1
GO:0060969	negative regulation of gene silencing	1	30	0.020924	0.175422	ENSBTAG00000013271	NCOR1
GO:0010677	negative regulation of cellular carbohydrate metabolic process	1	31	0.0216145	0.175422	ENSBTAG00000013271	NCOR1
GO:0060964	regulation of gene silencing by miRNA	1	33	0.0229942	0.175422	ENSBTAG00000013271	NCOR1
GO:0006110	regulation of glycolytic process	1	34	0.0236833	0.175422	ENSBTAG00000013271	NCOR1
GO:0030521	androgen receptor signaling pathway	1	34	0.0236833	0.175422	ENSBTAG00000013271	NCOR1
GO:0030811	regulation of nucleotide catabolic process	1	35	0.024372	0.175422	ENSBTAG00000013271	NCOR1
GO:0045980	negative regulation of nucleotide metabolic process	1	35	0.024372	0.175422	ENSBTAG00000013271	NCOR1
GO:1900543	negative regulation of purine nucleotide metabolic process	1	35	0.024372	0.175422	ENSBTAG00000013271	NCOR1
GO:0043471	regulation of cellular carbohydrate catabolic process	1	36	0.0250603	0.175422	ENSBTAG00000013271	NCOR1
GO:0060147	regulation of posttranscriptional gene silencing	1	36	0.0250603	0.175422	ENSBTAG00000013271	NCOR1
GO:0060966	regulation of gene silencing by RNA	1	36	0.0250603	0.175422	ENSBTAG00000013271	NCOR1
GO:0043470	regulation of carbohydrate catabolic process	1	37	0.0257481	0.175841	ENSBTAG00000013271	NCOR1
GO:0035196	production of miRNAs involved in gene silencing by miRNA	1	41	0.028495	0.176051	ENSBTAG00000013271	NCOR1
GO:0045912	negative regulation of carbohydrate metabolic process	1	41	0.028495	0.176051	ENSBTAG00000013271	NCOR1
GO:0031050	dsRNA fragmentation	1	43	0.0298658	0.176051	ENSBTAG00000013271	NCOR1
GO:0051196	regulation of coenzyme metabolic process	1	43	0.0298658	0.176051	ENSBTAG00000013271	NCOR1
GO:0070918	production of small RNA involved in gene silencing by RNA	1	43	0.0298658	0.176051	ENSBTAG00000013271	NCOR1
GO:0051193	regulation of cofactor metabolic process	1	44	0.0305505	0.178211	ENSBTAG00000013271	NCOR1
GO:0033143	regulation of intracellular steroid hormone receptor signaling pathway	1	57	0.0394116	0.200451	ENSBTAG00000013271	NCOR1
GO:0044275	cellular carbohydrate catabolic process	1	58	0.0400902	0.200451	ENSBTAG00000013271	NCOR1
GO:0035195	gene silencing by miRNA	1	60	0.041446	0.201615	ENSBTAG00000013271	NCOR1
GO:0060968	regulation of gene silencing	1	60	0.041446	0.201615	ENSBTAG00000013271	NCOR1
GO:0071359	cellular response to dsRNA	1	60	0.041446	0.201615	ENSBTAG00000013271	NCOR1
GO:0006096	glycolytic process	1	65	0.0448277	0.204094	ENSBTAG00000013271	NCOR1
GO:0006757	ATP generation from ADP	1	65	0.0448277	0.204094	ENSBTAG00000013271	NCOR1
GO:0009118	regulation of nucleoside metabolic process	1	65	0.0448277	0.204094	ENSBTAG00000013271	NCOR1
GO:0019217	regulation of fatty acid metabolic process	1	65	0.0448277	0.204094	ENSBTAG00000013271	NCOR1
GO:1903578	regulation of ATP metabolic process	1	65	0.0448277	0.204094	ENSBTAG00000013271	NCOR1
GO:0035194	posttranscriptional gene silencing by RNA	1	66	0.0455027	0.205496	ENSBTAG00000013271	NCOR1
GO:0045833	negative regulation of lipid metabolic process	1	67	0.0461773	0.206874	ENSBTAG00000013271	NCOR1
GO:0016441	posttranscriptional gene silencing	1	70	0.0481985	0.210868	ENSBTAG00000013271	NCOR1
GO:0046031	ADP metabolic process	1	72	0.0495437	0.213419	ENSBTAG00000013271	NCOR1
GO:0009135	purine nucleoside diphosphate metabolic process	1	78	0.0535691	0.221414	ENSBTAG00000013271	NCOR1
GO:0009179	purine ribonucleoside diphosphate metabolic process	1	78	0.0535691	0.221414	ENSBTAG00000013271	NCOR1
GO:0009166	nucleotide catabolic process	1	81	0.0555759	0.221414	ENSBTAG00000013271	NCOR1
GO:0009185	ribonucleoside diphosphate metabolic process	1	81	0.0555759	0.221414	ENSBTAG00000013271	NCOR1
GO:0006165	nucleoside diphosphate phosphorylation	1	83	0.0569116	0.221414	ENSBTAG00000013271	NCOR1
GO:0046939	nucleotide phosphorylation	1	84	0.0575788	0.221414	ENSBTAG00000013271	NCOR1
GO:0006090	pyruvate metabolic process	1	86	0.0589119	0.221414	ENSBTAG00000013271	NCOR1
GO:0031047	gene silencing by RNA	1	86	0.0589119	0.221414	ENSBTAG00000013271	NCOR1
GO:0043467	regulation of generation of precursor metabolites and energy	1	89	0.0609083	0.225885	ENSBTAG00000013271	NCOR1
GO:0051225	spindle assembly	1	91	0.0622371	0.226317	ENSBTAG00000013271	NCOR1
GO:1901292	nucleoside phosphate catabolic process	1	91	0.0622371	0.226317	ENSBTAG00000013271	NCOR1
GO:0010565	regulation of cellular ketone metabolic process	1	95	0.0648895	0.229284	ENSBTAG00000013271	NCOR1
GO:0045727	positive regulation of translation	1	96	0.0655515	0.229284	ENSBTAG00000013271	NCOR1
GO:1900542	regulation of purine nucleotide metabolic process	1	98	0.0668743	0.229284	ENSBTAG00000013271	NCOR1
GO:0006140	regulation of nucleotide metabolic process	1	100	0.0681953	0.229284	ENSBTAG00000013271	NCOR1
GO:0044724	single-organism carbohydrate catabolic process	1	100	0.0681953	0.229284	ENSBTAG00000013271	NCOR1
GO:0009132	nucleoside diphosphate metabolic process	1	101	0.0688552	0.229284	ENSBTAG00000013271	NCOR1
GO:0043331	response to dsRNA	1	102	0.0695147	0.229284	ENSBTAG00000013271	NCOR1
GO:0016052	carbohydrate catabolic process	1	103	0.0701737	0.229284	ENSBTAG00000013271	NCOR1
GO:0019362	pyridine nucleotide metabolic process	1	104	0.0708323	0.229284	ENSBTAG00000013271	NCOR1
GO:0046496	nicotinamide nucleotide metabolic process	1	104	0.0708323	0.229284	ENSBTAG00000013271	NCOR1
GO:0072524	pyridine-containing compound metabolic process	1	108	0.0734624	0.231118	ENSBTAG00000013271	NCOR1
GO:0034250	positive regulation of cellular amide metabolic process	1	113	0.0767404	0.240082	ENSBTAG00000013271	NCOR1
GO:0043409	negative regulation of MAPK cascade	1	118	0.0800078	0.244833	ENSBTAG00000013271	NCOR1
GO:0006733	oxidoreduction coenzyme metabolic process	1	120	0.0813118	0.246133	ENSBTAG00000013271	NCOR1
GO:0010675	regulation of cellular carbohydrate metabolic process	1	131	0.0884535	0.257989	ENSBTAG00000013271	NCOR1
GO:0046328	regulation of JNK cascade	1	133	0.0897465	0.259588	ENSBTAG00000013271	NCOR1
GO:0017148	negative regulation of translation	1	134	0.0903924	0.259588	ENSBTAG00000013271	NCOR1
GO:0006109	regulation of carbohydrate metabolic process	1	137	0.0923275	0.262454	ENSBTAG00000013271	NCOR1
GO:0007254	JNK cascade	1	142	0.0955443	0.264875	ENSBTAG00000013271	NCOR1
GO:0046434	organophosphate catabolic process	1	145	0.0974694	0.266258	ENSBTAG00000013271	NCOR1
GO:0034249	negative regulation of cellular amide metabolic process	1	148	0.0993907	0.267819	ENSBTAG00000013271	NCOR1
GO:0007051	spindle organization	1	150	0.100669	0.269736	ENSBTAG00000013271	NCOR1
GO:0042180	cellular ketone metabolic process	1	156	0.104496	0.270915	ENSBTAG00000013271	NCOR1
GO:0016458	gene silencing	1	165	0.110207	0.276556	ENSBTAG00000013271	NCOR1
GO:0032872	regulation of stress-activated MAPK cascade	1	165	0.110207	0.276556	ENSBTAG00000013271	NCOR1
GO:0031330	negative regulation of cellular catabolic process	1	168	0.112104	0.276556	ENSBTAG00000013271	NCOR1
GO:0070302	regulation of stress-activated protein kinase signaling cascade	1	168	0.112104	0.276556	ENSBTAG00000013271	NCOR1
GO:0051403	stress-activated MAPK cascade	1	182	0.120905	0.293103	ENSBTAG00000013271	NCOR1
GO:0040029	regulation of gene expression, epigenetic	1	191	0.12652	0.29645	ENSBTAG00000013271	NCOR1
GO:0031098	stress-activated protein kinase signaling cascade	1	195	0.129006	0.299764	ENSBTAG00000013271	NCOR1
GO:0046034	ATP metabolic process	1	209	0.137653	0.309581	ENSBTAG00000013271	NCOR1
GO:0009895	negative regulation of catabolic process	1	214	0.140722	0.313438	ENSBTAG00000013271	NCOR1
GO:0009205	purine ribonucleoside triphosphate metabolic process	1	226	0.148048	0.31765	ENSBTAG00000013271	NCOR1
GO:0009144	purine nucleoside triphosphate metabolic process	1	230	0.150477	0.321629	ENSBTAG00000013271	NCOR1
GO:0009199	ribonucleoside triphosphate metabolic process	1	233	0.152294	0.323048	ENSBTAG00000013271	NCOR1
GO:0009167	purine ribonucleoside monophosphate metabolic process	1	242	0.157726	0.32717	ENSBTAG00000013271	NCOR1
GO:0006732	coenzyme metabolic process	1	243	0.158327	0.32717	ENSBTAG00000013271	NCOR1
GO:0009126	purine nucleoside monophosphate metabolic process	1	243	0.158327	0.32717	ENSBTAG00000013271	NCOR1
GO:0044262	cellular carbohydrate metabolic process	1	243	0.158327	0.32717	ENSBTAG00000013271	NCOR1
GO:0019216	regulation of lipid metabolic process	1	248	0.161329	0.332147	ENSBTAG00000013271	NCOR1
GO:0009141	nucleoside triphosphate metabolic process	1	250	0.162527	0.333388	ENSBTAG00000013271	NCOR1
GO:0009161	ribonucleoside monophosphate metabolic process	1	256	0.166111	0.338262	ENSBTAG00000013271	NCOR1
GO:0034655	nucleobase-containing compound catabolic process	1	260	0.168493	0.341869	ENSBTAG00000013271	NCOR1
GO:0006417	regulation of translation	1	273	0.176191	0.348448	ENSBTAG00000013271	NCOR1
GO:0009123	nucleoside monophosphate metabolic process	1	276	0.177958	0.348448	ENSBTAG00000013271	NCOR1
GO:0006631	fatty acid metabolic process	1	287	0.184407	0.351252	ENSBTAG00000013271	NCOR1
GO:0044270	cellular nitrogen compound catabolic process	1	290	0.186158	0.351264	ENSBTAG00000013271	NCOR1
GO:0046700	heterocycle catabolic process	1	293	0.187906	0.351264	ENSBTAG00000013271	NCOR1
GO:0001933	negative regulation of protein phosphorylation	1	295	0.189069	0.351264	ENSBTAG00000013271	NCOR1
GO:0046128	purine ribonucleoside metabolic process	1	296	0.18965	0.351264	ENSBTAG00000013271	NCOR1
GO:0019439	aromatic compound catabolic process	1	299	0.19139	0.351264	ENSBTAG00000013271	NCOR1
GO:0042278	purine nucleoside metabolic process	1	300	0.19197	0.351264	ENSBTAG00000013271	NCOR1
GO:0034248	regulation of cellular amide metabolic process	1	309	0.197168	0.351264	ENSBTAG00000013271	NCOR1
GO:0009119	ribonucleoside metabolic process	1	316	0.201189	0.353185	ENSBTAG00000013271	NCOR1
GO:1901361	organic cyclic compound catabolic process	1	324	0.205763	0.35847	ENSBTAG00000013271	NCOR1
GO:0042326	negative regulation of phosphorylation	1	331	0.209745	0.360038	ENSBTAG00000013271	NCOR1
GO:0009116	nucleoside metabolic process	1	333	0.210879	0.360038	ENSBTAG00000013271	NCOR1
GO:0010608	posttranscriptional regulation of gene expression	1	348	0.219339	0.371862	ENSBTAG00000013271	NCOR1
GO:0009150	purine ribonucleotide metabolic process	1	349	0.219901	0.371862	ENSBTAG00000013271	NCOR1
GO:1901657	glycosyl compound metabolic process	1	356	0.223818	0.375076	ENSBTAG00000013271	NCOR1
GO:0006163	purine nucleotide metabolic process	1	359	0.225491	0.375818	ENSBTAG00000013271	NCOR1
GO:0009259	ribonucleotide metabolic process	1	365	0.228827	0.379059	ENSBTAG00000013271	NCOR1
GO:0019693	ribose phosphate metabolic process	1	377	0.235461	0.38668	ENSBTAG00000013271	NCOR1
GO:0072521	purine-containing compound metabolic process	1	396	0.245857	0.394592	ENSBTAG00000013271	NCOR1
GO:1901699	cellular response to nitrogen compound	1	412	0.254511	0.402616	ENSBTAG00000013271	NCOR1
GO:0032787	monocarboxylic acid metabolic process	1	443	0.271019	0.421911	ENSBTAG00000013271	NCOR1
GO:0010563	negative regulation of phosphorus metabolic process	1	446	0.272599	0.421911	ENSBTAG00000013271	NCOR1
GO:0045936	negative regulation of phosphate metabolic process	1	446	0.272599	0.421911	ENSBTAG00000013271	NCOR1
GO:0009117	nucleotide metabolic process	1	452	0.275749	0.421911	ENSBTAG00000013271	NCOR1
GO:0006753	nucleoside phosphate metabolic process	1	463	0.281492	0.426828	ENSBTAG00000013271	NCOR1
GO:0055086	nucleobase-containing small molecule metabolic process	1	502	0.301517	0.447876	ENSBTAG00000013271	NCOR1
GO:0031329	regulation of cellular catabolic process	1	508	0.304552	0.448117	ENSBTAG00000013271	NCOR1
GO:0043408	regulation of MAPK cascade	1	513	0.307071	0.448117	ENSBTAG00000013271	NCOR1
GO:0031400	negative regulation of protein modification process	1	528	0.314581	0.452867	ENSBTAG00000013271	NCOR1
GO:0000226	microtubule cytoskeleton organization	1	534	0.317564	0.454823	ENSBTAG00000013271	NCOR1
GO:0070925	organelle assembly	1	539	0.32004	0.455256	ENSBTAG00000013271	NCOR1
GO:1901698	response to nitrogen compound	1	546	0.323494	0.456314	ENSBTAG00000013271	NCOR1
GO:0000165	MAPK cascade	1	559	0.329865	0.460659	ENSBTAG00000013271	NCOR1
GO:0023014	signal transduction by protein phosphorylation	1	559	0.329865	0.460659	ENSBTAG00000013271	NCOR1
GO:0080135	regulation of cellular response to stress	1	575	0.33763	0.466847	ENSBTAG00000013271	NCOR1
GO:0009894	regulation of catabolic process	1	620	0.359031	0.485108	ENSBTAG00000013271	NCOR1
GO:0006412	translation	1	681	0.38703	0.513594	ENSBTAG00000013271	NCOR1
GO:0043043	peptide biosynthetic process	1	697	0.394185	0.520569	ENSBTAG00000013271	NCOR1
GO:0000122	negative regulation of transcription from RNA polymerase II promoter	1	699	0.395074	0.520569	ENSBTAG00000013271	NCOR1
GO:0019752	carboxylic acid metabolic process	1	743	0.414334	0.540856	ENSBTAG00000013271	NCOR1
GO:0044712	single-organism catabolic process	1	752	0.418204	0.544637	ENSBTAG00000013271	NCOR1
GO:0043604	amide biosynthetic process	1	770	0.425873	0.549513	ENSBTAG00000013271	NCOR1
GO:0006396	RNA processing	1	787	0.43303	0.556186	ENSBTAG00000013271	NCOR1
GO:0043436	oxoacid metabolic process	1	802	0.439278	0.557626	ENSBTAG00000013271	NCOR1
GO:0006518	peptide metabolic process	1	813	0.443819	0.561035	ENSBTAG00000013271	NCOR1
GO:0006082	organic acid metabolic process	1	822	0.44751	0.564427	ENSBTAG00000013271	NCOR1
GO:0019637	organophosphate metabolic process	1	837	0.453611	0.569556	ENSBTAG00000013271	NCOR1
GO:0032269	negative regulation of cellular protein metabolic process	1	889	0.474286	0.588914	ENSBTAG00000013271	NCOR1
GO:0051248	negative regulation of protein metabolic process	1	934	0.491597	0.599811	ENSBTAG00000013271	NCOR1
GO:0043603	cellular amide metabolic process	1	947	0.496499	0.601817	ENSBTAG00000013271	NCOR1
GO:0022402	cell cycle process	1	963	0.502474	0.603831	ENSBTAG00000013271	NCOR1
GO:0080134	regulation of response to stress	1	1032	0.527502	0.629853	ENSBTAG00000013271	NCOR1
GO:0045892	negative regulation of transcription, DNA-templated	1	1073	0.541822	0.641888	ENSBTAG00000013271	NCOR1
GO:1903507	negative regulation of nucleic acid-templated transcription	1	1074	0.542166	0.641888	ENSBTAG00000013271	NCOR1
GO:1902679	negative regulation of RNA biosynthetic process	1	1083	0.545253	0.644033	ENSBTAG00000013271	NCOR1
GO:0001932	regulation of protein phosphorylation	1	1086	0.546278	0.644033	ENSBTAG00000013271	NCOR1
GO:0051253	negative regulation of RNA metabolic process	1	1118	0.55708	0.651673	ENSBTAG00000013271	NCOR1
GO:0032270	positive regulation of cellular protein metabolic process	1	1192	0.581161	0.672418	ENSBTAG00000013271	NCOR1
GO:0042325	regulation of phosphorylation	1	1197	0.582744	0.672859	ENSBTAG00000013271	NCOR1
GO:0045934	negative regulation of nucleobase-containing compound metabolic process	1	1227	0.592128	0.67881	ENSBTAG00000013271	NCOR1
GO:0007049	cell cycle	1	1229	0.592746	0.67881	ENSBTAG00000013271	NCOR1
GO:2000113	negative regulation of cellular macromolecule biosynthetic process	1	1241	0.59644	0.681013	ENSBTAG00000013271	NCOR1
GO:0010558	negative regulation of macromolecule biosynthetic process	1	1255	0.600711	0.68337	ENSBTAG00000013271	NCOR1
GO:0051247	positive regulation of protein metabolic process	1	1262	0.60283	0.68337	ENSBTAG00000013271	NCOR1
GO:0031327	negative regulation of cellular biosynthetic process	1	1299	0.613864	0.691678	ENSBTAG00000013271	NCOR1
GO:0009890	negative regulation of biosynthetic process	1	1313	0.617965	0.694901	ENSBTAG00000013271	NCOR1
GO:0051172	negative regulation of nitrogen compound metabolic process	1	1354	0.629747	0.705634	ENSBTAG00000013271	NCOR1
GO:0019220	regulation of phosphate metabolic process	1	1361	0.631725	0.705969	ENSBTAG00000013271	NCOR1
GO:0051174	regulation of phosphorus metabolic process	1	1365	0.632851	0.705969	ENSBTAG00000013271	NCOR1
GO:0033554	cellular response to stress	1	1424	0.649096	0.710243	ENSBTAG00000013271	NCOR1
GO:0044248	cellular catabolic process	1	1472	0.661823	0.721052	ENSBTAG00000013271	NCOR1
GO:0031399	regulation of protein modification process	1	1497	0.668283	0.726676	ENSBTAG00000013271	NCOR1
GO:1901575	organic substance catabolic process	1	1534	0.677636	0.733996	ENSBTAG00000013271	NCOR1
GO:0044281	small molecule metabolic process	1	1558	0.683572	0.736058	ENSBTAG00000013271	NCOR1
GO:0009056	catabolic process	1	1776	0.733088	0.778993	ENSBTAG00000013271	NCOR1
GO:0031324	negative regulation of cellular metabolic process	1	2085	0.791176	0.820479	ENSBTAG00000013271	NCOR1
GO:0032268	regulation of cellular protein metabolic process	1	2094	0.792679	0.820518	ENSBTAG00000013271	NCOR1
GO:0051246	regulation of protein metabolic process	1	2232	0.814519	0.835404	ENSBTAG00000013271	NCOR1
GO:0006950	response to stress	1	2706	0.874471	0.887144	ENSBTAG00000013271	NCOR1
GO:1902532	negative regulation of intracellular signal transduction	2	406	0.0319005	0.182289	ENSBTAG00000013271;ENSBTAG00000021938	NCOR1;ARHGAP44
GO:0009968	negative regulation of signal transduction	2	910	0.131906	0.302735	ENSBTAG00000013271;ENSBTAG00000021938	NCOR1;ARHGAP44
GO:0023057	negative regulation of signaling	2	969	0.146193	0.314939	ENSBTAG00000013271;ENSBTAG00000021938	NCOR1;ARHGAP44
GO:0010648	negative regulation of cell communication	2	991	0.151612	0.322825	ENSBTAG00000013271;ENSBTAG00000021938	NCOR1;ARHGAP44
GO:0048585	negative regulation of response to stimulus	2	1211	0.20798	0.35847	ENSBTAG00000013271;ENSBTAG00000021938	NCOR1;ARHGAP44
GO:1902531	regulation of intracellular signal transduction	2	1292	0.229466	0.379059	ENSBTAG00000013271;ENSBTAG00000021938	NCOR1;ARHGAP44
GO:0035556	intracellular signal transduction	2	1919	0.398385	0.522473	ENSBTAG00000013271;ENSBTAG00000021938	NCOR1;ARHGAP44
GO:0009966	regulation of signal transduction	2	2177	0.465101	0.578793	ENSBTAG00000013271;ENSBTAG00000021938	NCOR1;ARHGAP44
GO:0023051	regulation of signaling	2	2460	0.534167	0.636454	ENSBTAG00000013271;ENSBTAG00000021938	NCOR1;ARHGAP44
GO:0010646	regulation of cell communication	2	2489	0.540961	0.641888	ENSBTAG00000013271;ENSBTAG00000021938	NCOR1;ARHGAP44
GO:0048583	regulation of response to stimulus	2	2924	0.635839	0.707892	ENSBTAG00000013271;ENSBTAG00000021938	NCOR1;ARHGAP44
GO:0048523	negative regulation of cellular process	2	3717	0.773026	0.806664	ENSBTAG00000013271;ENSBTAG00000021938	NCOR1;ARHGAP44
GO:0009893	positive regulation of metabolic process	3	3099	0.376712	0.504685	ENSBTAG00000013271;ENSBTAG00000021938;ENSBTAG00000024648	NCOR1;ARHGAP44;PGR
GO:0048519	negative regulation of biological process	3	3974	0.555511	0.651673	ENSBTAG00000013271;ENSBTAG00000021938;ENSBTAG00000024648	NCOR1;ARHGAP44;PGR
GO:0007165	signal transduction	3	5307	0.773533	0.806664	ENSBTAG00000013271;ENSBTAG00000021938;ENSBTAG00000024648	NCOR1;ARHGAP44;PGR
GO:0044700	single organism signaling	3	5629	0.813008	0.835404	ENSBTAG00000013271;ENSBTAG00000021938;ENSBTAG00000024648	NCOR1;ARHGAP44;PGR
GO:0023052	signaling	3	5640	0.814265	0.835404	ENSBTAG00000013271;ENSBTAG00000021938;ENSBTAG00000024648	NCOR1;ARHGAP44;PGR
GO:0007154	cell communication	3	5716	0.822784	0.842338	ENSBTAG00000013271;ENSBTAG00000021938;ENSBTAG00000024648	NCOR1;ARHGAP44;PGR
GO:0051716	cellular response to stimulus	3	6476	0.893056	0.901101	ENSBTAG00000013271;ENSBTAG00000021938;ENSBTAG00000024648	NCOR1;ARHGAP44;PGR
GO:0050896	response to stimulus	3	7535	0.952795	0.954499	ENSBTAG00000013271;ENSBTAG00000021938;ENSBTAG00000024648	NCOR1;ARHGAP44;PGR
GO:0051186	cofactor metabolic process	2	286	0.0165718	0.168731	ENSBTAG00000013271;ENSBTAG00000015294	NCOR1;COX10
GO:0006091	generation of precursor metabolites and energy	2	304	0.0185962	0.175422	ENSBTAG00000013271;ENSBTAG00000015294	NCOR1;COX10
GO:1901566	organonitrogen compound biosynthetic process	2	1172	0.197748	0.351264	ENSBTAG00000013271;ENSBTAG00000015294	NCOR1;COX10
GO:1901564	organonitrogen compound metabolic process	2	1837	0.376608	0.504685	ENSBTAG00000013271;ENSBTAG00000015294	NCOR1;COX10
GO:0007010	cytoskeleton organization	3	1173	0.0447695	0.204094	ENSBTAG00000013271;ENSBTAG00000019107;ENSBTAG00000021938	NCOR1;GAS7;ARHGAP44
GO:1902589	single-organism organelle organization	3	2267	0.207294	0.35847	ENSBTAG00000013271;ENSBTAG00000019107;ENSBTAG00000021938	NCOR1;GAS7;ARHGAP44
GO:0030518	intracellular steroid hormone receptor signaling pathway	2	84	0.00153392	0.118199	ENSBTAG00000013271;ENSBTAG00000024648	NCOR1;PGR
GO:0043401	steroid hormone mediated signaling pathway	2	98	0.00208001	0.118199	ENSBTAG00000013271;ENSBTAG00000024648	NCOR1;PGR
GO:0009755	hormone-mediated signaling pathway	2	137	0.00401518	0.159545	ENSBTAG00000013271;ENSBTAG00000024648	NCOR1;PGR
GO:0071383	cellular response to steroid hormone stimulus	2	150	0.00479199	0.159545	ENSBTAG00000013271;ENSBTAG00000024648	NCOR1;PGR
GO:0048545	response to steroid hormone	2	191	0.00765711	0.159545	ENSBTAG00000013271;ENSBTAG00000024648	NCOR1;PGR
GO:0030522	intracellular receptor signaling pathway	2	193	0.00781263	0.159545	ENSBTAG00000013271;ENSBTAG00000024648	NCOR1;PGR
GO:0071396	cellular response to lipid	2	332	0.0219445	0.175422	ENSBTAG00000013271;ENSBTAG00000024648	NCOR1;PGR
GO:0071407	cellular response to organic cyclic compound	2	345	0.0235794	0.175422	ENSBTAG00000013271;ENSBTAG00000024648	NCOR1;PGR
GO:0032870	cellular response to hormone stimulus	2	380	0.0282257	0.176051	ENSBTAG00000013271;ENSBTAG00000024648	NCOR1;PGR
GO:0009725	response to hormone	2	458	0.0397915	0.200451	ENSBTAG00000013271;ENSBTAG00000024648	NCOR1;PGR
GO:0033993	response to lipid	2	458	0.0397915	0.200451	ENSBTAG00000013271;ENSBTAG00000024648	NCOR1;PGR
GO:0014070	response to organic cyclic compound	2	471	0.0418722	0.201615	ENSBTAG00000013271;ENSBTAG00000024648	NCOR1;PGR
GO:0071495	cellular response to endogenous stimulus	2	879	0.124556	0.29645	ENSBTAG00000013271;ENSBTAG00000024648	NCOR1;PGR
GO:0009719	response to endogenous stimulus	2	1007	0.155583	0.326317	ENSBTAG00000013271;ENSBTAG00000024648	NCOR1;PGR
GO:0010629	negative regulation of gene expression	2	1359	0.247427	0.394592	ENSBTAG00000013271;ENSBTAG00000024648	NCOR1;PGR
GO:0010557	positive regulation of macromolecule biosynthetic process	2	1568	0.304023	0.448117	ENSBTAG00000013271;ENSBTAG00000024648	NCOR1;PGR
GO:0031328	positive regulation of cellular biosynthetic process	2	1634	0.321931	0.455256	ENSBTAG00000013271;ENSBTAG00000024648	NCOR1;PGR
GO:0009891	positive regulation of biosynthetic process	2	1651	0.326538	0.458299	ENSBTAG00000013271;ENSBTAG00000024648	NCOR1;PGR
GO:0071310	cellular response to organic substance	2	1667	0.330871	0.460914	ENSBTAG00000013271;ENSBTAG00000024648	NCOR1;PGR
GO:0051173	positive regulation of nitrogen compound metabolic process	2	1704	0.340876	0.469933	ENSBTAG00000013271;ENSBTAG00000024648	NCOR1;PGR
GO:0010628	positive regulation of gene expression	2	1728	0.347354	0.47548	ENSBTAG00000013271;ENSBTAG00000024648	NCOR1;PGR
GO:0010033	response to organic substance	2	2013	0.423042	0.549513	ENSBTAG00000013271;ENSBTAG00000024648	NCOR1;PGR
GO:0070887	cellular response to chemical stimulus	2	2063	0.436003	0.557626	ENSBTAG00000013271;ENSBTAG00000024648	NCOR1;PGR
GO:0010605	negative regulation of macromolecule metabolic process	2	2079	0.440126	0.557626	ENSBTAG00000013271;ENSBTAG00000024648	NCOR1;PGR
GO:0009892	negative regulation of metabolic process	2	2267	0.487584	0.598835	ENSBTAG00000013271;ENSBTAG00000024648	NCOR1;PGR
GO:0031325	positive regulation of cellular metabolic process	2	2654	0.578533	0.671535	ENSBTAG00000013271;ENSBTAG00000024648	NCOR1;PGR
GO:0010604	positive regulation of macromolecule metabolic process	2	2657	0.579199	0.671535	ENSBTAG00000013271;ENSBTAG00000024648	NCOR1;PGR
GO:0042221	response to chemical	2	3751	0.777892	0.809702	ENSBTAG00000013271;ENSBTAG00000024648	NCOR1;PGR
GO:0006468	protein phosphorylation	2	1522	0.291534	0.436958	ENSBTAG00000013271;ENSBTAG00000017739	NCOR1;TNK1
GO:0016310	phosphorylation	2	1849	0.379809	0.50762	ENSBTAG00000013271;ENSBTAG00000017739	NCOR1;TNK1
GO:0006796	phosphate-containing compound metabolic process	2	2600	0.566444	0.660851	ENSBTAG00000013271;ENSBTAG00000017739	NCOR1;TNK1
GO:0006793	phosphorus metabolic process	2	2642	0.575864	0.670445	ENSBTAG00000013271;ENSBTAG00000017739	NCOR1;TNK1
GO:0006464	cellular protein modification process	2	3370	0.71868	0.766592	ENSBTAG00000013271;ENSBTAG00000017739	NCOR1;TNK1
GO:0036211	protein modification process	2	3370	0.71868	0.766592	ENSBTAG00000013271;ENSBTAG00000017739	NCOR1;TNK1
GO:0043412	macromolecule modification	2	3525	0.744024	0.784825	ENSBTAG00000013271;ENSBTAG00000017739	NCOR1;TNK1
GO:0044267	cellular protein metabolic process	2	4427	0.858977	0.873007	ENSBTAG00000013271;ENSBTAG00000017739	NCOR1;TNK1
GO:0019538	protein metabolic process	2	5079	0.912762	0.916034	ENSBTAG00000013271;ENSBTAG00000017739	NCOR1;TNK1
GO:0060748	tertiary branching involved in mammary gland duct morphogenesis	1	2	0.00140758	0.118199	ENSBTAG00000024648	PGR
GO:0038001	paracrine signaling	1	3	0.00211069	0.118199	ENSBTAG00000024648	PGR
GO:0060745	mammary gland branching involved in pregnancy	1	5	0.00351555	0.159545	ENSBTAG00000024648	PGR
GO:0001542	ovulation from ovarian follicle	1	6	0.0042173	0.159545	ENSBTAG00000024648	PGR
GO:0050847	progesterone receptor signaling pathway	1	8	0.00561944	0.159545	ENSBTAG00000024648	PGR
GO:0002070	epithelial cell maturation	1	10	0.00701977	0.159545	ENSBTAG00000024648	PGR
GO:0030728	ovulation	1	11	0.00771926	0.159545	ENSBTAG00000024648	PGR
GO:0060444	branching involved in mammary gland duct morphogenesis	1	21	0.0146893	0.166734	ENSBTAG00000024648	PGR
GO:0060603	mammary gland duct morphogenesis	1	28	0.0195416	0.175422	ENSBTAG00000024648	PGR
GO:0060135	maternal process involved in female pregnancy	1	29	0.020233	0.175422	ENSBTAG00000024648	PGR
GO:0048286	lung alveolus development	1	37	0.0257481	0.175841	ENSBTAG00000024648	PGR
GO:0060443	mammary gland morphogenesis	1	40	0.027809	0.176051	ENSBTAG00000024648	PGR
GO:0022602	ovulation cycle process	1	52	0.0360123	0.195795	ENSBTAG00000024648	PGR
GO:0042698	ovulation cycle	1	58	0.0400902	0.200451	ENSBTAG00000024648	PGR
GO:0061180	mammary gland epithelium development	1	58	0.0400902	0.200451	ENSBTAG00000024648	PGR
GO:0008585	female gonad development	1	68	0.0468515	0.208229	ENSBTAG00000024648	PGR
GO:0046545	development of primary female sexual characteristics	1	70	0.0481985	0.210868	ENSBTAG00000024648	PGR
GO:0007292	female gamete generation	1	81	0.0555759	0.221414	ENSBTAG00000024648	PGR
GO:0007565	female pregnancy	1	81	0.0555759	0.221414	ENSBTAG00000024648	PGR
GO:0046660	female sex differentiation	1	82	0.056244	0.221414	ENSBTAG00000024648	PGR
GO:0022612	gland morphogenesis	1	98	0.0668743	0.229284	ENSBTAG00000024648	PGR
GO:0044706	multi-multicellular organism process	1	104	0.0708323	0.229284	ENSBTAG00000024648	PGR
GO:0030879	mammary gland development	1	106	0.0721482	0.230447	ENSBTAG00000024648	PGR
GO:0048469	cell maturation	1	128	0.0865108	0.257051	ENSBTAG00000024648	PGR
GO:0048754	branching morphogenesis of an epithelial tube	1	128	0.0865108	0.257051	ENSBTAG00000024648	PGR
GO:0030324	lung development	1	141	0.0949018	0.264875	ENSBTAG00000024648	PGR
GO:0030323	respiratory tube development	1	143	0.0961864	0.265342	ENSBTAG00000024648	PGR
GO:0008406	gonad development	1	152	0.101947	0.270517	ENSBTAG00000024648	PGR
GO:0061138	morphogenesis of a branching epithelium	1	154	0.103222	0.270517	ENSBTAG00000024648	PGR
GO:0045137	development of primary sexual characteristics	1	155	0.103859	0.270517	ENSBTAG00000024648	PGR
GO:0060541	respiratory system development	1	159	0.106403	0.27333	ENSBTAG00000024648	PGR
GO:0001763	morphogenesis of a branching structure	1	165	0.110207	0.276556	ENSBTAG00000024648	PGR
GO:0002064	epithelial cell development	1	181	0.120279	0.293103	ENSBTAG00000024648	PGR
GO:0007548	sex differentiation	1	195	0.129006	0.299764	ENSBTAG00000024648	PGR
GO:0021700	developmental maturation	1	204	0.134574	0.306347	ENSBTAG00000024648	PGR
GO:0048511	rhythmic process	1	208	0.137038	0.309441	ENSBTAG00000024648	PGR
GO:0050678	regulation of epithelial cell proliferation	1	237	0.154712	0.32571	ENSBTAG00000024648	PGR
GO:0060562	epithelial tube morphogenesis	1	256	0.166111	0.338262	ENSBTAG00000024648	PGR
GO:0035239	tube morphogenesis	1	284	0.182653	0.351252	ENSBTAG00000024648	PGR
GO:0050673	epithelial cell proliferation	1	286	0.183823	0.351252	ENSBTAG00000024648	PGR
GO:0048732	gland development	1	292	0.187324	0.351264	ENSBTAG00000024648	PGR
GO:0048608	reproductive structure development	1	310	0.197743	0.351264	ENSBTAG00000024648	PGR
GO:0061458	reproductive system development	1	312	0.198893	0.351264	ENSBTAG00000024648	PGR
GO:0002009	morphogenesis of an epithelium	1	397	0.2464	0.394592	ENSBTAG00000024648	PGR
GO:0007276	gamete generation	1	397	0.2464	0.394592	ENSBTAG00000024648	PGR
GO:0030855	epithelial cell differentiation	1	461	0.280451	0.426773	ENSBTAG00000024648	PGR
GO:0048609	multicellular organismal reproductive process	1	464	0.282012	0.426828	ENSBTAG00000024648	PGR
GO:0035295	tube development	1	469	0.284606	0.429594	ENSBTAG00000024648	PGR
GO:0032504	multicellular organism reproduction	1	483	0.291826	0.436958	ENSBTAG00000024648	PGR
GO:0003006	developmental process involved in reproduction	1	499	0.299995	0.4468	ENSBTAG00000024648	PGR
GO:0048729	tissue morphogenesis	1	508	0.304552	0.448117	ENSBTAG00000024648	PGR
GO:0019953	sexual reproduction	1	513	0.307071	0.448117	ENSBTAG00000024648	PGR
GO:0044703	multi-organism reproductive process	1	589	0.344358	0.472648	ENSBTAG00000024648	PGR
GO:0007267	cell-cell signaling	1	713	0.401265	0.525019	ENSBTAG00000024648	PGR
GO:0009887	organ morphogenesis	1	777	0.42883	0.552057	ENSBTAG00000024648	PGR
GO:0044702	single organism reproductive process	1	851	0.459249	0.575346	ENSBTAG00000024648	PGR
GO:0060429	epithelium development	1	865	0.464834	0.578793	ENSBTAG00000024648	PGR
GO:0022414	reproductive process	1	913	0.483584	0.597809	ENSBTAG00000024648	PGR
GO:0000003	reproduction	1	916	0.484736	0.597912	ENSBTAG00000024648	PGR
GO:0045944	positive regulation of transcription from RNA polymerase II promoter	1	1016	0.521803	0.62438	ENSBTAG00000024648	PGR
GO:0042127	regulation of cell proliferation	1	1111	0.554737	0.651673	ENSBTAG00000024648	PGR
GO:0008283	cell proliferation	1	1355	0.63003	0.705634	ENSBTAG00000024648	PGR
GO:0045893	positive regulation of transcription, DNA-templated	1	1409	0.645029	0.710243	ENSBTAG00000024648	PGR
GO:1903508	positive regulation of nucleic acid-templated transcription	1	1409	0.645029	0.710243	ENSBTAG00000024648	PGR
GO:1902680	positive regulation of RNA biosynthetic process	1	1413	0.646118	0.710243	ENSBTAG00000024648	PGR
GO:0009888	tissue development	1	1417	0.647204	0.710243	ENSBTAG00000024648	PGR
GO:0051254	positive regulation of RNA metabolic process	1	1468	0.660779	0.721052	ENSBTAG00000024648	PGR
GO:0051704	multi-organism process	1	1513	0.672357	0.72969	ENSBTAG00000024648	PGR
GO:0045935	positive regulation of nucleobase-containing compound metabolic process	1	1609	0.695857	0.746513	ENSBTAG00000024648	PGR
GO:0048513	animal organ development	1	2413	0.839969	0.858363	ENSBTAG00000024648	PGR
GO:0046777	protein autophosphorylation	1	174	0.115886	0.284631	ENSBTAG00000017739	TNK1
GO:0032414	positive regulation of ion transmembrane transporter activity	1	50	0.0346495	0.194037	ENSBTAG00000011227	TRPC6
GO:0032411	positive regulation of transporter activity	1	55	0.0380532	0.200451	ENSBTAG00000011227	TRPC6
GO:0051928	positive regulation of calcium ion transport	1	61	0.0421232	0.201615	ENSBTAG00000011227	TRPC6
GO:0034767	positive regulation of ion transmembrane transport	1	88	0.0602433	0.224908	ENSBTAG00000011227	TRPC6
GO:0034764	positive regulation of transmembrane transport	1	93	0.0635642	0.229284	ENSBTAG00000011227	TRPC6
GO:0051924	regulation of calcium ion transport	1	130	0.0878064	0.257443	ENSBTAG00000011227	TRPC6
GO:0032412	regulation of ion transmembrane transporter activity	1	144	0.0968281	0.265803	ENSBTAG00000011227	TRPC6
GO:0043270	positive regulation of ion transport	1	147	0.0987506	0.267819	ENSBTAG00000011227	TRPC6
GO:0022898	regulation of transmembrane transporter activity	1	153	0.102584	0.270517	ENSBTAG00000011227	TRPC6
GO:0032409	regulation of transporter activity	1	161	0.107673	0.274077	ENSBTAG00000011227	TRPC6
GO:0007204	positive regulation of cytosolic calcium ion concentration	1	182	0.120905	0.293103	ENSBTAG00000011227	TRPC6
GO:0051480	regulation of cytosolic calcium ion concentration	1	205	0.13519	0.306505	ENSBTAG00000011227	TRPC6
GO:0070588	calcium ion transmembrane transport	1	215	0.141335	0.313438	ENSBTAG00000011227	TRPC6
GO:0010959	regulation of metal ion transport	1	219	0.143781	0.314522	ENSBTAG00000011227	TRPC6
GO:0006816	calcium ion transport	1	286	0.183823	0.351252	ENSBTAG00000011227	TRPC6
GO:0006874	cellular calcium ion homeostasis	1	287	0.184407	0.351252	ENSBTAG00000011227	TRPC6
GO:0034765	regulation of ion transmembrane transport	1	294	0.188487	0.351264	ENSBTAG00000011227	TRPC6
GO:0055074	calcium ion homeostasis	1	297	0.19023	0.351264	ENSBTAG00000011227	TRPC6
GO:0034762	regulation of transmembrane transport	1	311	0.198319	0.351264	ENSBTAG00000011227	TRPC6
GO:0072503	cellular divalent inorganic cation homeostasis	1	313	0.199468	0.351264	ENSBTAG00000011227	TRPC6
GO:0070838	divalent metal ion transport	1	323	0.205192	0.35847	ENSBTAG00000011227	TRPC6
GO:0072511	divalent inorganic cation transport	1	326	0.206902	0.35847	ENSBTAG00000011227	TRPC6
GO:0072507	divalent inorganic cation homeostasis	1	328	0.20804	0.35847	ENSBTAG00000011227	TRPC6
GO:0006875	cellular metal ion homeostasis	1	397	0.2464	0.394592	ENSBTAG00000011227	TRPC6
GO:0043269	regulation of ion transport	1	412	0.254511	0.402616	ENSBTAG00000011227	TRPC6
GO:0030003	cellular cation homeostasis	1	448	0.27365	0.421911	ENSBTAG00000011227	TRPC6
GO:0055065	metal ion homeostasis	1	451	0.275225	0.421911	ENSBTAG00000011227	TRPC6
GO:0006873	cellular ion homeostasis	1	457	0.278364	0.424752	ENSBTAG00000011227	TRPC6
GO:0055080	cation homeostasis	1	510	0.30556	0.448117	ENSBTAG00000011227	TRPC6
GO:0098771	inorganic ion homeostasis	1	517	0.309081	0.448408	ENSBTAG00000011227	TRPC6
GO:0055082	cellular chemical homeostasis	1	528	0.314581	0.452867	ENSBTAG00000011227	TRPC6
GO:0051050	positive regulation of transport	1	542	0.321522	0.455256	ENSBTAG00000011227	TRPC6
GO:0050801	ion homeostasis	1	569	0.334728	0.464158	ENSBTAG00000011227	TRPC6
GO:0019725	cellular homeostasis	1	597	0.348173	0.47548	ENSBTAG00000011227	TRPC6
GO:0030001	metal ion transport	1	646	0.371105	0.499565	ENSBTAG00000011227	TRPC6
GO:0048878	chemical homeostasis	1	826	0.449143	0.565213	ENSBTAG00000011227	TRPC6
GO:0051049	regulation of transport	1	1119	0.557413	0.651673	ENSBTAG00000011227	TRPC6
GO:0042592	homeostatic process	1	1286	0.61002	0.688732	ENSBTAG00000011227	TRPC6
GO:0032879	regulation of localization	1	1932	0.764045	0.801246	ENSBTAG00000011227	TRPC6
GO:0065008	regulation of biological quality	1	2792	0.883216	0.894396	ENSBTAG00000011227	TRPC6
GO:0044093	positive regulation of molecular function	2	1220	0.210352	0.360038	ENSBTAG00000011227;ENSBTAG00000021938	TRPC6;ARHGAP44
GO:0065009	regulation of molecular function	2	2288	0.492763	0.599886	ENSBTAG00000011227;ENSBTAG00000021938	TRPC6;ARHGAP44
GO:0098662	inorganic cation transmembrane transport	2	585	0.0618135	0.226317	ENSBTAG00000011227;ENSBTAG00000015294	TRPC6;COX10
GO:0098660	inorganic ion transmembrane transport	2	640	0.0724263	0.230447	ENSBTAG00000011227;ENSBTAG00000015294	TRPC6;COX10
GO:0098655	cation transmembrane transport	2	672	0.0788677	0.24267	ENSBTAG00000011227;ENSBTAG00000015294	TRPC6;COX10
GO:0006812	cation transport	2	907	0.13119	0.30233	ENSBTAG00000011227;ENSBTAG00000015294	TRPC6;COX10
GO:0034220	ion transmembrane transport	2	914	0.132862	0.303686	ENSBTAG00000011227;ENSBTAG00000015294	TRPC6;COX10
GO:0055085	transmembrane transport	2	1271	0.223868	0.375076	ENSBTAG00000011227;ENSBTAG00000015294	TRPC6;COX10
GO:0006811	ion transport	2	1356	0.24662	0.394592	ENSBTAG00000011227;ENSBTAG00000015294	TRPC6;COX10
GO:0044765	single-organism transport	2	3150	0.679669	0.734778	ENSBTAG00000011227;ENSBTAG00000015294	TRPC6;COX10
GO:1902578	single-organism localization	2	3365	0.717833	0.766592	ENSBTAG00000011227;ENSBTAG00000015294	TRPC6;COX10
GO:0006810	transport	2	3526	0.744182	0.784825	ENSBTAG00000011227;ENSBTAG00000015294	TRPC6;COX10
GO:0051234	establishment of localization	2	3668	0.765872	0.80166	ENSBTAG00000011227;ENSBTAG00000015294	TRPC6;COX10
GO:0051179	localization	2	4951	0.903819	0.908687	ENSBTAG00000011227;ENSBTAG00000015294	TRPC6;COX10
GO:0048518	positive regulation of biological process	4	4868	0.462727	0.578409	ENSBTAG00000011227;ENSBTAG00000013271;ENSBTAG00000021938;ENSBTAG00000024648	TRPC6;NCOR1;ARHGAP44;PGR
GO:0048522	positive regulation of cellular process	3	4247	0.606799	0.68648	ENSBTAG00000011227;ENSBTAG00000013271;ENSBTAG00000024648	TRPC6;NCOR1;PGR
GO:0017062	respiratory chain complex III assembly	1	9	0.00631983	0.159545	ENSBTAG00000013270	TTC19
GO:0034551	mitochondrial respiratory chain complex III assembly	1	9	0.00631983	0.159545	ENSBTAG00000013270	TTC19
GO:0097033	mitochondrial respiratory chain complex III biogenesis	1	9	0.00631983	0.159545	ENSBTAG00000013270	TTC19
GO:0033108	mitochondrial respiratory chain complex assembly	1	72	0.0495437	0.213419	ENSBTAG00000013270	TTC19
GO:0017004	cytochrome complex assembly	2	31	0.000208896	0.116982	ENSBTAG00000013270;ENSBTAG00000015294	TTC19;COX10
GO:0007005	mitochondrion organization	2	454	0.0391597	0.200451	ENSBTAG00000013270;ENSBTAG00000015294	TTC19;COX10
GO:0043623	cellular protein complex assembly	3	526	0.0052208	0.159545	ENSBTAG00000013270;ENSBTAG00000015294;ENSBTAG00000019107	TTC19;COX10;GAS7
GO:0034622	cellular macromolecular complex assembly	3	960	0.0267304	0.176051	ENSBTAG00000013270;ENSBTAG00000015294;ENSBTAG00000019107	TTC19;COX10;GAS7
GO:0006461	protein complex assembly	4	1067	0.00503645	0.159545	ENSBTAG00000013270;ENSBTAG00000013271;ENSBTAG00000015294;ENSBTAG00000019107	TTC19;NCOR1;COX10;GAS7
GO:0070271	protein complex biogenesis	4	1067	0.00503645	0.159545	ENSBTAG00000013270;ENSBTAG00000013271;ENSBTAG00000015294;ENSBTAG00000019107	TTC19;NCOR1;COX10;GAS7
GO:0065003	macromolecular complex assembly	4	1399	0.013091	0.166734	ENSBTAG00000013270;ENSBTAG00000013271;ENSBTAG00000015294;ENSBTAG00000019107	TTC19;NCOR1;COX10;GAS7
GO:0071822	protein complex subunit organization	4	1466	0.0153774	0.166734	ENSBTAG00000013270;ENSBTAG00000013271;ENSBTAG00000015294;ENSBTAG00000019107	TTC19;NCOR1;COX10;GAS7
GO:0022607	cellular component assembly	4	2128	0.0525428	0.221414	ENSBTAG00000013270;ENSBTAG00000013271;ENSBTAG00000015294;ENSBTAG00000019107	TTC19;NCOR1;COX10;GAS7
GO:0043933	macromolecular complex subunit organization	4	2269	0.0641829	0.229284	ENSBTAG00000013270;ENSBTAG00000013271;ENSBTAG00000015294;ENSBTAG00000019107	TTC19;NCOR1;COX10;GAS7
GO:0044085	cellular component biogenesis	4	2337	0.0702815	0.229284	ENSBTAG00000013270;ENSBTAG00000013271;ENSBTAG00000015294;ENSBTAG00000019107	TTC19;NCOR1;COX10;GAS7
GO:0006996	organelle organization	5	3210	0.0579888	0.221414	ENSBTAG00000013270;ENSBTAG00000013271;ENSBTAG00000015294;ENSBTAG00000019107;ENSBTAG00000021938	TTC19;NCOR1;COX10;GAS7;ARHGAP44
GO:0016043	cellular component organization	5	5219	0.292808	0.437261	ENSBTAG00000013270;ENSBTAG00000013271;ENSBTAG00000015294;ENSBTAG00000019107;ENSBTAG00000021938	TTC19;NCOR1;COX10;GAS7;ARHGAP44
GO:0071840	cellular component organization or biogenesis	5	5390	0.32022	0.455256	ENSBTAG00000013270;ENSBTAG00000013271;ENSBTAG00000015294;ENSBTAG00000019107;ENSBTAG00000021938	TTC19;NCOR1;COX10;GAS7;ARHGAP44
GO:0019222	regulation of metabolic process	5	5770	0.383339	0.511118	ENSBTAG00000008349;ENSBTAG00000013271;ENSBTAG00000021938;ENSBTAG00000024648;ENSBTAG00000037988	ZNF311;NCOR1;ARHGAP44;PGR;ZSCAN31
GO:0018130	heterocycle biosynthetic process	5	3333	0.0667106	0.229284	ENSBTAG00000008349;ENSBTAG00000013271;ENSBTAG00000015294;ENSBTAG00000024648;ENSBTAG00000037988	ZNF311;NCOR1;COX10;PGR;ZSCAN31
GO:0019438	aromatic compound biosynthetic process	5	3339	0.0671558	0.229284	ENSBTAG00000008349;ENSBTAG00000013271;ENSBTAG00000015294;ENSBTAG00000024648;ENSBTAG00000037988	ZNF311;NCOR1;COX10;PGR;ZSCAN31
GO:1901362	organic cyclic compound biosynthetic process	5	3421	0.0734242	0.231118	ENSBTAG00000008349;ENSBTAG00000013271;ENSBTAG00000015294;ENSBTAG00000024648;ENSBTAG00000037988	ZNF311;NCOR1;COX10;PGR;ZSCAN31
GO:0044271	cellular nitrogen compound biosynthetic process	5	4026	0.130406	0.301767	ENSBTAG00000008349;ENSBTAG00000013271;ENSBTAG00000015294;ENSBTAG00000024648;ENSBTAG00000037988	ZNF311;NCOR1;COX10;PGR;ZSCAN31
GO:0046483	heterocycle metabolic process	5	4856	0.23745	0.388806	ENSBTAG00000008349;ENSBTAG00000013271;ENSBTAG00000015294;ENSBTAG00000024648;ENSBTAG00000037988	ZNF311;NCOR1;COX10;PGR;ZSCAN31
GO:0006725	cellular aromatic compound metabolic process	5	4881	0.241121	0.392522	ENSBTAG00000008349;ENSBTAG00000013271;ENSBTAG00000015294;ENSBTAG00000024648;ENSBTAG00000037988	ZNF311;NCOR1;COX10;PGR;ZSCAN31
GO:0044249	cellular biosynthetic process	5	4892	0.242743	0.394018	ENSBTAG00000008349;ENSBTAG00000013271;ENSBTAG00000015294;ENSBTAG00000024648;ENSBTAG00000037988	ZNF311;NCOR1;COX10;PGR;ZSCAN31
GO:1901360	organic cyclic compound metabolic process	5	5044	0.265591	0.417784	ENSBTAG00000008349;ENSBTAG00000013271;ENSBTAG00000015294;ENSBTAG00000024648;ENSBTAG00000037988	ZNF311;NCOR1;COX10;PGR;ZSCAN31
GO:0034641	cellular nitrogen compound metabolic process	5	5565	0.348969	0.47548	ENSBTAG00000008349;ENSBTAG00000013271;ENSBTAG00000015294;ENSBTAG00000024648;ENSBTAG00000037988	ZNF311;NCOR1;COX10;PGR;ZSCAN31
GO:0006807	nitrogen compound metabolic process	5	5848	0.396565	0.521306	ENSBTAG00000008349;ENSBTAG00000013271;ENSBTAG00000015294;ENSBTAG00000024648;ENSBTAG00000037988	ZNF311;NCOR1;COX10;PGR;ZSCAN31
GO:0006357	regulation of transcription from RNA polymerase II promoter	4	2118	0.0517687	0.221301	ENSBTAG00000008349;ENSBTAG00000013271;ENSBTAG00000024648;ENSBTAG00000037988	ZNF311;NCOR1;PGR;ZSCAN31
GO:0006366	transcription from RNA polymerase II promoter	4	2191	0.0575761	0.221414	ENSBTAG00000008349;ENSBTAG00000013271;ENSBTAG00000024648;ENSBTAG00000037988	ZNF311;NCOR1;PGR;ZSCAN31
GO:0006355	regulation of transcription, DNA-templated	4	2844	0.125501	0.29645	ENSBTAG00000008349;ENSBTAG00000013271;ENSBTAG00000024648;ENSBTAG00000037988	ZNF311;NCOR1;PGR;ZSCAN31
GO:1903506	regulation of nucleic acid-templated transcription	4	2845	0.125627	0.29645	ENSBTAG00000008349;ENSBTAG00000013271;ENSBTAG00000024648;ENSBTAG00000037988	ZNF311;NCOR1;PGR;ZSCAN31
GO:2001141	regulation of RNA biosynthetic process	4	2851	0.12638	0.29645	ENSBTAG00000008349;ENSBTAG00000013271;ENSBTAG00000024648;ENSBTAG00000037988	ZNF311;NCOR1;PGR;ZSCAN31
GO:0006351	transcription, DNA-templated	4	2972	0.142034	0.313438	ENSBTAG00000008349;ENSBTAG00000013271;ENSBTAG00000024648;ENSBTAG00000037988	ZNF311;NCOR1;PGR;ZSCAN31
GO:0097659	nucleic acid-templated transcription	4	2973	0.142167	0.313438	ENSBTAG00000008349;ENSBTAG00000013271;ENSBTAG00000024648;ENSBTAG00000037988	ZNF311;NCOR1;PGR;ZSCAN31
GO:0032774	RNA biosynthetic process	4	2990	0.144437	0.314726	ENSBTAG00000008349;ENSBTAG00000013271;ENSBTAG00000024648;ENSBTAG00000037988	ZNF311;NCOR1;PGR;ZSCAN31
GO:0051252	regulation of RNA metabolic process	4	3001	0.145914	0.314939	ENSBTAG00000008349;ENSBTAG00000013271;ENSBTAG00000024648;ENSBTAG00000037988	ZNF311;NCOR1;PGR;ZSCAN31
GO:2000112	regulation of cellular macromolecule biosynthetic process	4	3190	0.172372	0.345292	ENSBTAG00000008349;ENSBTAG00000013271;ENSBTAG00000024648;ENSBTAG00000037988	ZNF311;NCOR1;PGR;ZSCAN31
GO:0010556	regulation of macromolecule biosynthetic process	4	3213	0.175724	0.348448	ENSBTAG00000008349;ENSBTAG00000013271;ENSBTAG00000024648;ENSBTAG00000037988	ZNF311;NCOR1;PGR;ZSCAN31
GO:0019219	regulation of nucleobase-containing compound metabolic process	4	3259	0.182511	0.351252	ENSBTAG00000008349;ENSBTAG00000013271;ENSBTAG00000024648;ENSBTAG00000037988	ZNF311;NCOR1;PGR;ZSCAN31
GO:0034654	nucleobase-containing compound biosynthetic process	4	3270	0.18415	0.351252	ENSBTAG00000008349;ENSBTAG00000013271;ENSBTAG00000024648;ENSBTAG00000037988	ZNF311;NCOR1;PGR;ZSCAN31
GO:0031326	regulation of cellular biosynthetic process	4	3323	0.19213	0.351264	ENSBTAG00000008349;ENSBTAG00000013271;ENSBTAG00000024648;ENSBTAG00000037988	ZNF311;NCOR1;PGR;ZSCAN31
GO:0009889	regulation of biosynthetic process	4	3364	0.198398	0.351264	ENSBTAG00000008349;ENSBTAG00000013271;ENSBTAG00000024648;ENSBTAG00000037988	ZNF311;NCOR1;PGR;ZSCAN31
GO:0051171	regulation of nitrogen compound metabolic process	4	3487	0.217669	0.3705	ENSBTAG00000008349;ENSBTAG00000013271;ENSBTAG00000024648;ENSBTAG00000037988	ZNF311;NCOR1;PGR;ZSCAN31
GO:0010468	regulation of gene expression	4	3559	0.229256	0.379059	ENSBTAG00000008349;ENSBTAG00000013271;ENSBTAG00000024648;ENSBTAG00000037988	ZNF311;NCOR1;PGR;ZSCAN31
GO:0016070	RNA metabolic process	4	3824	0.273612	0.421911	ENSBTAG00000008349;ENSBTAG00000013271;ENSBTAG00000024648;ENSBTAG00000037988	ZNF311;NCOR1;PGR;ZSCAN31
GO:0034645	cellular macromolecule biosynthetic process	4	4171	0.334857	0.464158	ENSBTAG00000008349;ENSBTAG00000013271;ENSBTAG00000024648;ENSBTAG00000037988	ZNF311;NCOR1;PGR;ZSCAN31
GO:0009059	macromolecule biosynthetic process	4	4208	0.341541	0.469933	ENSBTAG00000008349;ENSBTAG00000013271;ENSBTAG00000024648;ENSBTAG00000037988	ZNF311;NCOR1;PGR;ZSCAN31
GO:0090304	nucleic acid metabolic process	4	4274	0.353517	0.479809	ENSBTAG00000008349;ENSBTAG00000013271;ENSBTAG00000024648;ENSBTAG00000037988	ZNF311;NCOR1;PGR;ZSCAN31
GO:0006139	nucleobase-containing compound metabolic process	4	4733	0.437879	0.557626	ENSBTAG00000008349;ENSBTAG00000013271;ENSBTAG00000024648;ENSBTAG00000037988	ZNF311;NCOR1;PGR;ZSCAN31
GO:0010467	gene expression	4	4740	0.439169	0.557626	ENSBTAG00000008349;ENSBTAG00000013271;ENSBTAG00000024648;ENSBTAG00000037988	ZNF311;NCOR1;PGR;ZSCAN31
GO:0080090	regulation of primary metabolic process	4	4946	0.477028	0.591008	ENSBTAG00000008349;ENSBTAG00000013271;ENSBTAG00000024648;ENSBTAG00000037988	ZNF311;NCOR1;PGR;ZSCAN31
GO:0031323	regulation of cellular metabolic process	4	5004	0.487622	0.598835	ENSBTAG00000008349;ENSBTAG00000013271;ENSBTAG00000024648;ENSBTAG00000037988	ZNF311;NCOR1;PGR;ZSCAN31
GO:0060255	regulation of macromolecule metabolic process	4	5026	0.491631	0.599811	ENSBTAG00000008349;ENSBTAG00000013271;ENSBTAG00000024648;ENSBTAG00000037988	ZNF311;NCOR1;PGR;ZSCAN31
GO:0044260	cellular macromolecule metabolic process	5	7590	0.683891	0.736058	ENSBTAG00000008349;ENSBTAG00000013271;ENSBTAG00000017739;ENSBTAG00000024648;ENSBTAG00000037988	ZNF311;NCOR1;TNK1;PGR;ZSCAN31
GO:0043170	macromolecule metabolic process	5	8346	0.785595	0.816203	ENSBTAG00000008349;ENSBTAG00000013271;ENSBTAG00000017739;ENSBTAG00000024648;ENSBTAG00000037988	ZNF311;NCOR1;TNK1;PGR;ZSCAN31
GO:0050794	regulation of cellular process	6	9861	0.801268	0.827878	ENSBTAG00000008349;ENSBTAG00000011227;ENSBTAG00000013271;ENSBTAG00000021938;ENSBTAG00000024648;ENSBTAG00000037988	ZNF311;TRPC6;NCOR1;ARHGAP44;PGR;ZSCAN31
GO:0050789	regulation of biological process	6	10392	0.858411	0.873007	ENSBTAG00000008349;ENSBTAG00000011227;ENSBTAG00000013271;ENSBTAG00000021938;ENSBTAG00000024648;ENSBTAG00000037988	ZNF311;TRPC6;NCOR1;ARHGAP44;PGR;ZSCAN31
GO:0065007	biological regulation	6	10899	0.90231	0.908687	ENSBTAG00000008349;ENSBTAG00000011227;ENSBTAG00000013271;ENSBTAG00000021938;ENSBTAG00000024648;ENSBTAG00000037988	ZNF311;TRPC6;NCOR1;ARHGAP44;PGR;ZSCAN31
