# Supplementary material for: Genome-Wide Association Study of Age at First Calving in U.S. Holstein Cows
Source: MDPI journal article supplement (doi:10.3390/ijms24087109), 2023-04-12
Supplement: s1 [file Table_S6.xlsx]

## Sheet: table_s6
GO ID	Description	out (7)	All (17045)	pvalue	p.adjust	Genes	Gene_Symbol
GO:0090307	mitotic spindle assembly	1	52	0.0211645	0.180455	ENSBTAG00000020179	AAAS
GO:1902850	microtubule cytoskeleton organization involved in mitosis	1	64	0.0259937	0.186632	ENSBTAG00000020179	AAAS
GO:0051225	spindle assembly	1	91	0.0367848	0.194172	ENSBTAG00000020179	AAAS
GO:0007612	learning	1	93	0.03758	0.194172	ENSBTAG00000020179	AAAS
GO:0007052	mitotic spindle organization	1	94	0.0379774	0.194172	ENSBTAG00000020179	AAAS
GO:0001578	microtubule bundle formation	1	98	0.0395657	0.194172	ENSBTAG00000020179	AAAS
GO:0009566	fertilization	1	140	0.056107	0.214921	ENSBTAG00000020179	AAAS
GO:0007051	spindle organization	1	150	0.0600092	0.214921	ENSBTAG00000020179	AAAS
GO:0007611	learning or memory	1	154	0.0615663	0.214921	ENSBTAG00000020179	AAAS
GO:0050890	cognition	1	183	0.0727886	0.228228	ENSBTAG00000020179	AAAS
GO:0007067	mitotic nuclear division	1	227	0.089596	0.251697	ENSBTAG00000020179	AAAS
GO:0006913	nucleocytoplasmic transport	1	264	0.103527	0.260694	ENSBTAG00000020179	AAAS
GO:0051169	nuclear transport	1	264	0.103527	0.260694	ENSBTAG00000020179	AAAS
GO:0044708	single-organism behavior	1	299	0.116536	0.275805	ENSBTAG00000020179	AAAS
GO:0000280	nuclear division	1	345	0.133387	0.304204	ENSBTAG00000020179	AAAS
GO:0048285	organelle fission	1	383	0.147099	0.309481	ENSBTAG00000020179	AAAS
GO:0019953	sexual reproduction	1	513	0.192612	0.35919	ENSBTAG00000020179	AAAS
GO:1903047	mitotic cell cycle process	1	532	0.199087	0.367064	ENSBTAG00000020179	AAAS
GO:0000226	microtubule cytoskeleton organization	1	534	0.199765	0.367064	ENSBTAG00000020179	AAAS
GO:0070925	organelle assembly	1	539	0.201461	0.367064	ENSBTAG00000020179	AAAS
GO:0044703	multi-organism reproductive process	1	589	0.218243	0.380165	ENSBTAG00000020179	AAAS
GO:0000278	mitotic cell cycle	1	658	0.240906	0.399591	ENSBTAG00000020179	AAAS
GO:0007017	microtubule-based process	1	701	0.254742	0.411827	ENSBTAG00000020179	AAAS
GO:0016482	cytoplasmic transport	1	809	0.288545	0.438227	ENSBTAG00000020179	AAAS
GO:0044702	single organism reproductive process	1	851	0.301331	0.442437	ENSBTAG00000020179	AAAS
GO:0022414	reproductive process	1	913	0.319845	0.462536	ENSBTAG00000020179	AAAS
GO:0000003	reproduction	1	916	0.32073	0.462536	ENSBTAG00000020179	AAAS
GO:0022402	cell cycle process	1	963	0.334467	0.467101	ENSBTAG00000020179	AAAS
GO:0007049	cell cycle	1	1229	0.407817	0.520971	ENSBTAG00000020179	AAAS
GO:0046907	intracellular transport	1	1442	0.461447	0.556485	ENSBTAG00000020179	AAAS
GO:0051704	multi-organism process	1	1513	0.478372	0.572633	ENSBTAG00000020179	AAAS
GO:0050877	neurological system process	1	1647	0.509076	0.596171	ENSBTAG00000020179	AAAS
GO:0051649	establishment of localization in cell	1	1865	0.555719	0.639999	ENSBTAG00000020179	AAAS
GO:0003008	system process	1	2106	0.602812	0.681318	ENSBTAG00000020179	AAAS
GO:0051641	cellular localization	1	2390	0.652756	0.719364	ENSBTAG00000020179	AAAS
GO:0006357	regulation of transcription from RNA polymerase II promoter	1	2118	0.60504	0.68225	ENSBTAG00000005863	ATF7
GO:0006366	transcription from RNA polymerase II promoter	1	2191	0.618367	0.694056	ENSBTAG00000005863	ATF7
GO:0006355	regulation of transcription, DNA-templated	1	2844	0.721422	0.778443	ENSBTAG00000005863	ATF7
GO:1903506	regulation of nucleic acid-templated transcription	1	2845	0.72156	0.778443	ENSBTAG00000005863	ATF7
GO:2001141	regulation of RNA biosynthetic process	1	2851	0.722382	0.778443	ENSBTAG00000005863	ATF7
GO:0006351	transcription, DNA-templated	1	2972	0.738534	0.790729	ENSBTAG00000005863	ATF7
GO:0097659	nucleic acid-templated transcription	1	2973	0.738664	0.790729	ENSBTAG00000005863	ATF7
GO:0032774	RNA biosynthetic process	1	2990	0.740867	0.791118	ENSBTAG00000005863	ATF7
GO:0051252	regulation of RNA metabolic process	1	3001	0.742283	0.791118	ENSBTAG00000005863	ATF7
GO:2000112	regulation of cellular macromolecule biosynthetic process	1	3190	0.765608	0.809382	ENSBTAG00000005863	ATF7
GO:0010556	regulation of macromolecule biosynthetic process	1	3213	0.768318	0.809984	ENSBTAG00000005863	ATF7
GO:0019219	regulation of nucleobase-containing compound metabolic process	1	3259	0.773659	0.81385	ENSBTAG00000005863	ATF7
GO:0031326	regulation of cellular biosynthetic process	1	3323	0.780915	0.818876	ENSBTAG00000005863	ATF7
GO:0009889	regulation of biosynthetic process	1	3364	0.785457	0.820929	ENSBTAG00000005863	ATF7
GO:0051171	regulation of nitrogen compound metabolic process	1	3487	0.798603	0.832878	ENSBTAG00000005863	ATF7
GO:0016070	RNA metabolic process	1	3824	0.831144	0.861271	ENSBTAG00000005863	ATF7
GO:0090304	nucleic acid metabolic process	1	4274	0.8675	0.888679	ENSBTAG00000005863	ATF7
GO:0010468	regulation of gene expression	2	3559	0.447383	0.544933	ENSBTAG00000005863;ENSBTAG00000018488	ATF7;AFF1
GO:0060255	regulation of macromolecule metabolic process	3	5026	0.341298	0.473418	ENSBTAG00000005863;ENSBTAG00000018488;ENSBTAG00000019686	ATF7;AFF1;NCKAP1L
GO:0019222	regulation of metabolic process	3	5770	0.441299	0.540415	ENSBTAG00000005863;ENSBTAG00000018488;ENSBTAG00000019686	ATF7;AFF1;NCKAP1L
GO:0050789	regulation of biological process	3	10392	0.912855	0.926196	ENSBTAG00000005863;ENSBTAG00000018488;ENSBTAG00000019686	ATF7;AFF1;NCKAP1L
GO:0065007	biological regulation	3	10899	0.937077	0.94879	ENSBTAG00000005863;ENSBTAG00000018488;ENSBTAG00000019686	ATF7;AFF1;NCKAP1L
GO:0034645	cellular macromolecule biosynthetic process	2	4171	0.541803	0.629944	ENSBTAG00000005863;ENSBTAG00000006883	ATF7;EIF4B
GO:0009059	macromolecule biosynthetic process	2	4208	0.547273	0.633273	ENSBTAG00000005863;ENSBTAG00000006883	ATF7;EIF4B
GO:0010467	gene expression	3	4740	0.303827	0.444759	ENSBTAG00000005863;ENSBTAG00000006883;ENSBTAG00000018488	ATF7;EIF4B;AFF1
GO:0080090	regulation of primary metabolic process	2	4946	0.649433	0.717328	ENSBTAG00000005863;ENSBTAG00000019686	ATF7;NCKAP1L
GO:0031323	regulation of cellular metabolic process	2	5004	0.656861	0.72062	ENSBTAG00000005863;ENSBTAG00000019686	ATF7;NCKAP1L
GO:0050794	regulation of cellular process	2	9861	0.97496	0.981016	ENSBTAG00000005863;ENSBTAG00000019686	ATF7;NCKAP1L
GO:0015985	energy coupled proton transport, down electrochemical gradient	1	29	0.0118511	0.161005	ENSBTAG00000005735	ATP5MC2
GO:0015986	ATP synthesis coupled proton transport	1	29	0.0118511	0.161005	ENSBTAG00000005735	ATP5MC2
GO:0006754	ATP biosynthetic process	1	43	0.0175291	0.170383	ENSBTAG00000005735	ATP5MC2
GO:0009145	purine nucleoside triphosphate biosynthetic process	1	52	0.0211645	0.180455	ENSBTAG00000005735	ATP5MC2
GO:0009206	purine ribonucleoside triphosphate biosynthetic process	1	52	0.0211645	0.180455	ENSBTAG00000005735	ATP5MC2
GO:0009201	ribonucleoside triphosphate biosynthetic process	1	58	0.0235816	0.18485	ENSBTAG00000005735	ATP5MC2
GO:0009127	purine nucleoside monophosphate biosynthetic process	1	67	0.0271978	0.186632	ENSBTAG00000005735	ATP5MC2
GO:0009142	nucleoside triphosphate biosynthetic process	1	67	0.0271978	0.186632	ENSBTAG00000005735	ATP5MC2
GO:0009168	purine ribonucleoside monophosphate biosynthetic process	1	67	0.0271978	0.186632	ENSBTAG00000005735	ATP5MC2
GO:0009156	ribonucleoside monophosphate biosynthetic process	1	78	0.0316019	0.194172	ENSBTAG00000005735	ATP5MC2
GO:0009124	nucleoside monophosphate biosynthetic process	1	87	0.0351926	0.194172	ENSBTAG00000005735	ATP5MC2
GO:0042451	purine nucleoside biosynthetic process	1	92	0.0371825	0.194172	ENSBTAG00000005735	ATP5MC2
GO:0046129	purine ribonucleoside biosynthetic process	1	92	0.0371825	0.194172	ENSBTAG00000005735	ATP5MC2
GO:0009163	nucleoside biosynthetic process	1	102	0.0411517	0.194172	ENSBTAG00000005735	ATP5MC2
GO:0042455	ribonucleoside biosynthetic process	1	102	0.0411517	0.194172	ENSBTAG00000005735	ATP5MC2
GO:1901659	glycosyl compound biosynthetic process	1	105	0.0423397	0.195972	ENSBTAG00000005735	ATP5MC2
GO:1902600	hydrogen ion transmembrane transport	1	130	0.0521909	0.214921	ENSBTAG00000005735	ATP5MC2
GO:0009152	purine ribonucleotide biosynthetic process	1	141	0.0564979	0.214921	ENSBTAG00000005735	ATP5MC2
GO:0006818	hydrogen transport	1	142	0.0568886	0.214921	ENSBTAG00000005735	ATP5MC2
GO:0015992	proton transport	1	142	0.0568886	0.214921	ENSBTAG00000005735	ATP5MC2
GO:0006164	purine nucleotide biosynthetic process	1	145	0.0580599	0.214921	ENSBTAG00000005735	ATP5MC2
GO:0009260	ribonucleotide biosynthetic process	1	152	0.060788	0.214921	ENSBTAG00000005735	ATP5MC2
GO:0046390	ribose phosphate biosynthetic process	1	156	0.0623439	0.214921	ENSBTAG00000005735	ATP5MC2
GO:0072522	purine-containing compound biosynthetic process	1	157	0.0627326	0.214921	ENSBTAG00000005735	ATP5MC2
GO:0009165	nucleotide biosynthetic process	1	198	0.078548	0.235039	ENSBTAG00000005735	ATP5MC2
GO:1901293	nucleoside phosphate biosynthetic process	1	202	0.0800787	0.235868	ENSBTAG00000005735	ATP5MC2
GO:0046034	ATP metabolic process	1	209	0.0827521	0.242274	ENSBTAG00000005735	ATP5MC2
GO:0009205	purine ribonucleoside triphosphate metabolic process	1	226	0.0892169	0.251697	ENSBTAG00000005735	ATP5MC2
GO:0009144	purine nucleoside triphosphate metabolic process	1	230	0.0907323	0.251977	ENSBTAG00000005735	ATP5MC2
GO:0009199	ribonucleoside triphosphate metabolic process	1	233	0.0918675	0.25368	ENSBTAG00000005735	ATP5MC2
GO:0009167	purine ribonucleoside monophosphate metabolic process	1	242	0.0952657	0.254002	ENSBTAG00000005735	ATP5MC2
GO:0009126	purine nucleoside monophosphate metabolic process	1	243	0.0956426	0.254002	ENSBTAG00000005735	ATP5MC2
GO:0009141	nucleoside triphosphate metabolic process	1	250	0.0982772	0.256392	ENSBTAG00000005735	ATP5MC2
GO:0009161	ribonucleoside monophosphate metabolic process	1	256	0.10053	0.259881	ENSBTAG00000005735	ATP5MC2
GO:0009123	nucleoside monophosphate metabolic process	1	276	0.108005	0.269182	ENSBTAG00000005735	ATP5MC2
GO:0046128	purine ribonucleoside metabolic process	1	296	0.115427	0.275805	ENSBTAG00000005735	ATP5MC2
GO:0042278	purine nucleoside metabolic process	1	300	0.116905	0.275805	ENSBTAG00000005735	ATP5MC2
GO:0009119	ribonucleoside metabolic process	1	316	0.122796	0.286917	ENSBTAG00000005735	ATP5MC2
GO:0009116	nucleoside metabolic process	1	333	0.129018	0.298584	ENSBTAG00000005735	ATP5MC2
GO:0009150	purine ribonucleotide metabolic process	1	349	0.134839	0.304204	ENSBTAG00000005735	ATP5MC2
GO:1901657	glycosyl compound metabolic process	1	356	0.137376	0.304861	ENSBTAG00000005735	ATP5MC2
GO:0006163	purine nucleotide metabolic process	1	359	0.138461	0.305872	ENSBTAG00000005735	ATP5MC2
GO:0009259	ribonucleotide metabolic process	1	365	0.140627	0.308787	ENSBTAG00000005735	ATP5MC2
GO:0090407	organophosphate biosynthetic process	1	375	0.144228	0.308787	ENSBTAG00000005735	ATP5MC2
GO:0019693	ribose phosphate metabolic process	1	377	0.144946	0.308965	ENSBTAG00000005735	ATP5MC2
GO:0072521	purine-containing compound metabolic process	1	396	0.151747	0.315908	ENSBTAG00000005735	ATP5MC2
GO:0009117	nucleotide metabolic process	1	452	0.171522	0.336129	ENSBTAG00000005735	ATP5MC2
GO:0006753	nucleoside phosphate metabolic process	1	463	0.17536	0.340216	ENSBTAG00000005735	ATP5MC2
GO:0015672	monovalent inorganic cation transport	1	480	0.181261	0.346822	ENSBTAG00000005735	ATP5MC2
GO:0055086	nucleobase-containing small molecule metabolic process	1	502	0.188844	0.355729	ENSBTAG00000005735	ATP5MC2
GO:1901137	carbohydrate derivative biosynthetic process	1	550	0.205179	0.367064	ENSBTAG00000005735	ATP5MC2
GO:0098662	inorganic cation transmembrane transport	1	585	0.216912	0.379205	ENSBTAG00000005735	ATP5MC2
GO:0098660	inorganic ion transmembrane transport	1	640	0.235049	0.395821	ENSBTAG00000005735	ATP5MC2
GO:0098655	cation transmembrane transport	1	672	0.245435	0.402977	ENSBTAG00000005735	ATP5MC2
GO:0019637	organophosphate metabolic process	1	837	0.297091	0.441997	ENSBTAG00000005735	ATP5MC2
GO:0006812	cation transport	1	907	0.318071	0.462536	ENSBTAG00000005735	ATP5MC2
GO:0034220	ion transmembrane transport	1	914	0.32014	0.462536	ENSBTAG00000005735	ATP5MC2
GO:1901135	carbohydrate derivative metabolic process	1	947	0.329818	0.467101	ENSBTAG00000005735	ATP5MC2
GO:0044711	single-organism biosynthetic process	1	1168	0.39164	0.510287	ENSBTAG00000005735	ATP5MC2
GO:0055085	transmembrane transport	1	1271	0.41874	0.521814	ENSBTAG00000005735	ATP5MC2
GO:0006811	ion transport	1	1356	0.440318	0.540415	ENSBTAG00000005735	ATP5MC2
GO:0044281	small molecule metabolic process	1	1558	0.488862	0.579435	ENSBTAG00000005735	ATP5MC2
GO:0044710	single-organism metabolic process	1	4142	0.857609	0.883046	ENSBTAG00000005735	ATP5MC2
GO:0034654	nucleobase-containing compound biosynthetic process	2	3270	0.400743	0.516607	ENSBTAG00000005735;ENSBTAG00000005863	ATP5MC2;ATF7
GO:0018130	heterocycle biosynthetic process	2	3333	0.410991	0.520971	ENSBTAG00000005735;ENSBTAG00000005863	ATP5MC2;ATF7
GO:0019438	aromatic compound biosynthetic process	2	3339	0.411965	0.520971	ENSBTAG00000005735;ENSBTAG00000005863	ATP5MC2;ATF7
GO:1901362	organic cyclic compound biosynthetic process	2	3421	0.425237	0.527207	ENSBTAG00000005735;ENSBTAG00000005863	ATP5MC2;ATF7
GO:0006139	nucleobase-containing compound metabolic process	2	4733	0.621376	0.695827	ENSBTAG00000005735;ENSBTAG00000005863	ATP5MC2;ATF7
GO:0046483	heterocycle metabolic process	2	4856	0.637726	0.707614	ENSBTAG00000005735;ENSBTAG00000005863	ATP5MC2;ATF7
GO:0006725	cellular aromatic compound metabolic process	2	4881	0.641	0.709627	ENSBTAG00000005735;ENSBTAG00000005863	ATP5MC2;ATF7
GO:1901360	organic cyclic compound metabolic process	2	5044	0.66193	0.724545	ENSBTAG00000005735;ENSBTAG00000005863	ATP5MC2;ATF7
GO:0044271	cellular nitrogen compound biosynthetic process	3	4026	0.215455	0.378019	ENSBTAG00000005735;ENSBTAG00000005863;ENSBTAG00000006883	ATP5MC2;ATF7;EIF4B
GO:0044249	cellular biosynthetic process	3	4892	0.323634	0.465344	ENSBTAG00000005735;ENSBTAG00000005863;ENSBTAG00000006883	ATP5MC2;ATF7;EIF4B
GO:1901576	organic substance biosynthetic process	3	4956	0.332049	0.467101	ENSBTAG00000005735;ENSBTAG00000005863;ENSBTAG00000006883	ATP5MC2;ATF7;EIF4B
GO:0009058	biosynthetic process	3	5038	0.342887	0.473418	ENSBTAG00000005735;ENSBTAG00000005863;ENSBTAG00000006883	ATP5MC2;ATF7;EIF4B
GO:0034641	cellular nitrogen compound metabolic process	3	5565	0.413582	0.520971	ENSBTAG00000005735;ENSBTAG00000005863;ENSBTAG00000006883	ATP5MC2;ATF7;EIF4B
GO:0006807	nitrogen compound metabolic process	3	5848	0.451838	0.548984	ENSBTAG00000005735;ENSBTAG00000005863;ENSBTAG00000006883	ATP5MC2;ATF7;EIF4B
GO:1901566	organonitrogen compound biosynthetic process	2	1172	0.0787153	0.235039	ENSBTAG00000005735;ENSBTAG00000006883	ATP5MC2;EIF4B
GO:1901564	organonitrogen compound metabolic process	2	1837	0.169263	0.334398	ENSBTAG00000005735;ENSBTAG00000006883	ATP5MC2;EIF4B
GO:0006796	phosphate-containing compound metabolic process	2	2600	0.290509	0.438469	ENSBTAG00000005735;ENSBTAG00000019686	ATP5MC2;NCKAP1L
GO:0006793	phosphorus metabolic process	2	2642	0.297415	0.441997	ENSBTAG00000005735;ENSBTAG00000019686	ATP5MC2;NCKAP1L
GO:0044765	single-organism transport	2	3150	0.381123	0.506885	ENSBTAG00000005735;ENSBTAG00000019686	ATP5MC2;NCKAP1L
GO:1902578	single-organism localization	2	3365	0.416182	0.520971	ENSBTAG00000005735;ENSBTAG00000019686	ATP5MC2;NCKAP1L
GO:0006810	transport	3	3526	0.160001	0.324001	ENSBTAG00000005735;ENSBTAG00000019686;ENSBTAG00000020179	ATP5MC2;NCKAP1L;AAAS
GO:0051234	establishment of localization	3	3668	0.175095	0.340216	ENSBTAG00000005735;ENSBTAG00000019686;ENSBTAG00000020179	ATP5MC2;NCKAP1L;AAAS
GO:0051179	localization	3	4951	0.33139	0.467101	ENSBTAG00000005735;ENSBTAG00000019686;ENSBTAG00000020179	ATP5MC2;NCKAP1L;AAAS
GO:0044763	single-organism cellular process	3	11990	0.972635	0.980707	ENSBTAG00000005735;ENSBTAG00000019686;ENSBTAG00000020179	ATP5MC2;NCKAP1L;AAAS
GO:0044699	single-organism process	3	13205	0.99196	0.994005	ENSBTAG00000005735;ENSBTAG00000019686;ENSBTAG00000020179	ATP5MC2;NCKAP1L;AAAS
GO:0097010	eukaryotic translation initiation factor 4F complex assembly	1	1	0.000410678	0.139565	ENSBTAG00000006883	EIF4B
GO:0001731	formation of translation preinitiation complex	1	9	0.0036909	0.149402	ENSBTAG00000006883	EIF4B
GO:0006413	translational initiation	1	92	0.0371825	0.194172	ENSBTAG00000006883	EIF4B
GO:0022618	ribonucleoprotein complex assembly	1	230	0.0907323	0.251977	ENSBTAG00000006883	EIF4B
GO:0071826	ribonucleoprotein complex subunit organization	1	241	0.0948887	0.254002	ENSBTAG00000006883	EIF4B
GO:0022613	ribonucleoprotein complex biogenesis	1	435	0.165561	0.32842	ENSBTAG00000006883	EIF4B
GO:0006412	translation	1	681	0.248334	0.405001	ENSBTAG00000006883	EIF4B
GO:0043043	peptide biosynthetic process	1	697	0.253464	0.411827	ENSBTAG00000006883	EIF4B
GO:0043604	amide biosynthetic process	1	770	0.276493	0.42659	ENSBTAG00000006883	EIF4B
GO:0006518	peptide metabolic process	1	813	0.289771	0.438469	ENSBTAG00000006883	EIF4B
GO:0043603	cellular amide metabolic process	1	947	0.329818	0.467101	ENSBTAG00000006883	EIF4B
GO:0043623	cellular protein complex assembly	2	526	0.0180077	0.171603	ENSBTAG00000006883;ENSBTAG00000019686	EIF4B;NCKAP1L
GO:0034622	cellular macromolecular complex assembly	2	960	0.0550839	0.214921	ENSBTAG00000006883;ENSBTAG00000019686	EIF4B;NCKAP1L
GO:0006461	protein complex assembly	3	1067	0.00707507	0.157508	ENSBTAG00000006883;ENSBTAG00000019686;ENSBTAG00000020179	EIF4B;NCKAP1L;AAAS
GO:0070271	protein complex biogenesis	3	1067	0.00707507	0.157508	ENSBTAG00000006883;ENSBTAG00000019686;ENSBTAG00000020179	EIF4B;NCKAP1L;AAAS
GO:0065003	macromolecular complex assembly	3	1399	0.0150132	0.170383	ENSBTAG00000006883;ENSBTAG00000019686;ENSBTAG00000020179	EIF4B;NCKAP1L;AAAS
GO:0071822	protein complex subunit organization	3	1466	0.0170639	0.170383	ENSBTAG00000006883;ENSBTAG00000019686;ENSBTAG00000020179	EIF4B;NCKAP1L;AAAS
GO:0022607	cellular component assembly	3	2128	0.0461267	0.199091	ENSBTAG00000006883;ENSBTAG00000019686;ENSBTAG00000020179	EIF4B;NCKAP1L;AAAS
GO:0043933	macromolecular complex subunit organization	3	2269	0.054442	0.214921	ENSBTAG00000006883;ENSBTAG00000019686;ENSBTAG00000020179	EIF4B;NCKAP1L;AAAS
GO:0044085	cellular component biogenesis	3	2337	0.0587201	0.214921	ENSBTAG00000006883;ENSBTAG00000019686;ENSBTAG00000020179	EIF4B;NCKAP1L;AAAS
GO:0016043	cellular component organization	3	5219	0.367002	0.500857	ENSBTAG00000006883;ENSBTAG00000019686;ENSBTAG00000020179	EIF4B;NCKAP1L;AAAS
GO:0071840	cellular component organization or biogenesis	3	5390	0.389967	0.510287	ENSBTAG00000006883;ENSBTAG00000019686;ENSBTAG00000020179	EIF4B;NCKAP1L;AAAS
GO:0006511	ubiquitin-dependent protein catabolic process	1	542	0.202476	0.367064	ENSBTAG00000002455	KLHL8
GO:0019941	modification-dependent protein catabolic process	1	553	0.20619	0.367064	ENSBTAG00000002455	KLHL8
GO:0043632	modification-dependent macromolecule catabolic process	1	558	0.207874	0.368711	ENSBTAG00000002455	KLHL8
GO:0051603	proteolysis involved in cellular protein catabolic process	1	625	0.230138	0.393828	ENSBTAG00000002455	KLHL8
GO:0044257	cellular protein catabolic process	1	650	0.238307	0.397998	ENSBTAG00000002455	KLHL8
GO:0016567	protein ubiquitination	1	677	0.247047	0.404258	ENSBTAG00000002455	KLHL8
GO:0032446	protein modification by small protein conjugation	1	731	0.264267	0.415643	ENSBTAG00000002455	KLHL8
GO:0030163	protein catabolic process	1	780	0.2796	0.428661	ENSBTAG00000002455	KLHL8
GO:0044265	cellular macromolecule catabolic process	1	819	0.291607	0.438765	ENSBTAG00000002455	KLHL8
GO:0070647	protein modification by small protein conjugation or removal	1	847	0.300121	0.441997	ENSBTAG00000002455	KLHL8
GO:0009057	macromolecule catabolic process	1	982	0.339953	0.473402	ENSBTAG00000002455	KLHL8
GO:0044248	cellular catabolic process	1	1472	0.468655	0.563778	ENSBTAG00000002455	KLHL8
GO:1901575	organic substance catabolic process	1	1534	0.48329	0.575684	ENSBTAG00000002455	KLHL8
GO:0006508	proteolysis	1	1557	0.488631	0.579435	ENSBTAG00000002455	KLHL8
GO:0009056	catabolic process	1	1776	0.537158	0.62604	ENSBTAG00000002455	KLHL8
GO:0043170	macromolecule metabolic process	5	8346	0.209879	0.370914	ENSBTAG00000002455;ENSBTAG00000005863;ENSBTAG00000006883;ENSBTAG00000018488;ENSBTAG00000019686	KLHL8;ATF7;EIF4B;AFF1;NCKAP1L
GO:0044260	cellular macromolecule metabolic process	4	7590	0.381728	0.506885	ENSBTAG00000002455;ENSBTAG00000005863;ENSBTAG00000006883;ENSBTAG00000019686	KLHL8;ATF7;EIF4B;NCKAP1L
GO:0071704	organic substance metabolic process	6	9800	0.128194	0.298097	ENSBTAG00000002455;ENSBTAG00000005735;ENSBTAG00000005863;ENSBTAG00000006883;ENSBTAG00000018488;ENSBTAG00000019686	KLHL8;ATP5MC2;ATF7;EIF4B;AFF1;NCKAP1L
GO:0008152	metabolic process	6	10579	0.187204	0.354012	ENSBTAG00000002455;ENSBTAG00000005735;ENSBTAG00000005863;ENSBTAG00000006883;ENSBTAG00000018488;ENSBTAG00000019686	KLHL8;ATP5MC2;ATF7;EIF4B;AFF1;NCKAP1L
GO:0008150	biological_process	7	17045	1	1	ENSBTAG00000002455;ENSBTAG00000005735;ENSBTAG00000005863;ENSBTAG00000006883;ENSBTAG00000018488;ENSBTAG00000019686;ENSBTAG00000020179	KLHL8;ATP5MC2;ATF7;EIF4B;AFF1;NCKAP1L;AAAS
GO:0044237	cellular metabolic process	5	9227	0.299743	0.441997	ENSBTAG00000002455;ENSBTAG00000005735;ENSBTAG00000005863;ENSBTAG00000006883;ENSBTAG00000019686	KLHL8;ATP5MC2;ATF7;EIF4B;NCKAP1L
GO:0044238	primary metabolic process	5	9407	0.320092	0.462536	ENSBTAG00000002455;ENSBTAG00000005735;ENSBTAG00000005863;ENSBTAG00000006883;ENSBTAG00000019686	KLHL8;ATP5MC2;ATF7;EIF4B;NCKAP1L
GO:0009987	cellular process	6	15468	0.868565	0.888679	ENSBTAG00000002455;ENSBTAG00000005735;ENSBTAG00000005863;ENSBTAG00000006883;ENSBTAG00000019686;ENSBTAG00000020179	KLHL8;ATP5MC2;ATF7;EIF4B;NCKAP1L;AAAS
GO:0044267	cellular protein metabolic process	3	4427	0.264007	0.415643	ENSBTAG00000002455;ENSBTAG00000006883;ENSBTAG00000019686	KLHL8;EIF4B;NCKAP1L
GO:0019538	protein metabolic process	3	5079	0.348328	0.47715	ENSBTAG00000002455;ENSBTAG00000006883;ENSBTAG00000019686	KLHL8;EIF4B;NCKAP1L
GO:0006464	cellular protein modification process	2	3370	0.416992	0.520971	ENSBTAG00000002455;ENSBTAG00000019686	KLHL8;NCKAP1L
GO:0036211	protein modification process	2	3370	0.416992	0.520971	ENSBTAG00000002455;ENSBTAG00000019686	KLHL8;NCKAP1L
GO:0043412	macromolecule modification	2	3525	0.441951	0.540415	ENSBTAG00000002455;ENSBTAG00000019686	KLHL8;NCKAP1L
GO:0043378	positive regulation of CD8-positive, alpha-beta T cell differentiation	1	2	0.000821211	0.139565	ENSBTAG00000019686	NCKAP1L
GO:2001187	positive regulation of CD8-positive, alpha-beta T cell activation	1	3	0.0012316	0.139565	ENSBTAG00000019686	NCKAP1L
GO:0043376	regulation of CD8-positive, alpha-beta T cell differentiation	1	4	0.00164184	0.139565	ENSBTAG00000019686	NCKAP1L
GO:0045588	positive regulation of gamma-delta T cell differentiation	1	6	0.0024619	0.139565	ENSBTAG00000019686	NCKAP1L
GO:0046645	positive regulation of gamma-delta T cell activation	1	6	0.0024619	0.139565	ENSBTAG00000019686	NCKAP1L
GO:0060100	positive regulation of phagocytosis, engulfment	1	6	0.0024619	0.139565	ENSBTAG00000019686	NCKAP1L
GO:0045586	regulation of gamma-delta T cell differentiation	1	7	0.00287171	0.139565	ENSBTAG00000019686	NCKAP1L
GO:0046643	regulation of gamma-delta T cell activation	1	7	0.00287171	0.139565	ENSBTAG00000019686	NCKAP1L
GO:0060099	regulation of phagocytosis, engulfment	1	7	0.00287171	0.139565	ENSBTAG00000019686	NCKAP1L
GO:0042492	gamma-delta T cell differentiation	1	10	0.00410028	0.149402	ENSBTAG00000019686	NCKAP1L
GO:2001185	regulation of CD8-positive, alpha-beta T cell activation	1	10	0.00410028	0.149402	ENSBTAG00000019686	NCKAP1L
GO:0043374	CD8-positive, alpha-beta T cell differentiation	1	12	0.0049186	0.149402	ENSBTAG00000019686	NCKAP1L
GO:0045579	positive regulation of B cell differentiation	1	12	0.0049186	0.149402	ENSBTAG00000019686	NCKAP1L
GO:0046629	gamma-delta T cell activation	1	12	0.0049186	0.149402	ENSBTAG00000019686	NCKAP1L
GO:0032700	negative regulation of interleukin-17 production	1	13	0.00532755	0.152305	ENSBTAG00000019686	NCKAP1L
GO:0033630	positive regulation of cell adhesion mediated by integrin	1	16	0.00655352	0.157508	ENSBTAG00000019686	NCKAP1L
GO:0090023	positive regulation of neutrophil chemotaxis	1	17	0.00696189	0.157508	ENSBTAG00000019686	NCKAP1L
GO:0036037	CD8-positive, alpha-beta T cell activation	1	19	0.00777819	0.157508	ENSBTAG00000019686	NCKAP1L
GO:0043372	positive regulation of CD4-positive, alpha-beta T cell differentiation	1	19	0.00777819	0.157508	ENSBTAG00000019686	NCKAP1L
GO:0071624	positive regulation of granulocyte chemotaxis	1	19	0.00777819	0.157508	ENSBTAG00000019686	NCKAP1L
GO:0045577	regulation of B cell differentiation	1	20	0.00818613	0.159138	ENSBTAG00000019686	NCKAP1L
GO:1902624	positive regulation of neutrophil migration	1	21	0.00859393	0.16064	ENSBTAG00000019686	NCKAP1L
GO:2000516	positive regulation of CD4-positive, alpha-beta T cell activation	1	22	0.00900158	0.161005	ENSBTAG00000019686	NCKAP1L
GO:0045648	positive regulation of erythrocyte differentiation	1	23	0.00940908	0.161005	ENSBTAG00000019686	NCKAP1L
GO:0090022	regulation of neutrophil chemotaxis	1	24	0.00981645	0.161005	ENSBTAG00000019686	NCKAP1L
GO:0001782	B cell homeostasis	1	25	0.0102237	0.161005	ENSBTAG00000019686	NCKAP1L
GO:0032620	interleukin-17 production	1	27	0.0110377	0.161005	ENSBTAG00000019686	NCKAP1L
GO:0032660	regulation of interleukin-17 production	1	27	0.0110377	0.161005	ENSBTAG00000019686	NCKAP1L
GO:0043029	T cell homeostasis	1	28	0.0114445	0.161005	ENSBTAG00000019686	NCKAP1L
GO:0032715	negative regulation of interleukin-6 production	1	30	0.0122576	0.161005	ENSBTAG00000019686	NCKAP1L
GO:0043370	regulation of CD4-positive, alpha-beta T cell differentiation	1	30	0.0122576	0.161005	ENSBTAG00000019686	NCKAP1L
GO:0046638	positive regulation of alpha-beta T cell differentiation	1	31	0.012664	0.161966	ENSBTAG00000019686	NCKAP1L
GO:1902622	regulation of neutrophil migration	1	32	0.0130702	0.162875	ENSBTAG00000019686	NCKAP1L
GO:0030866	cortical actin cytoskeleton organization	1	34	0.0138822	0.168669	ENSBTAG00000019686	NCKAP1L
GO:0045646	regulation of erythrocyte differentiation	1	35	0.014288	0.169365	ENSBTAG00000019686	NCKAP1L
GO:0033628	regulation of cell adhesion mediated by integrin	1	38	0.0155045	0.170383	ENSBTAG00000019686	NCKAP1L
GO:0071622	regulation of granulocyte chemotaxis	1	39	0.0159097	0.170383	ENSBTAG00000019686	NCKAP1L
GO:0046635	positive regulation of alpha-beta T cell activation	1	40	0.0163148	0.170383	ENSBTAG00000019686	NCKAP1L
GO:0050766	positive regulation of phagocytosis	1	40	0.0163148	0.170383	ENSBTAG00000019686	NCKAP1L
GO:2000514	regulation of CD4-positive, alpha-beta T cell activation	1	42	0.0171245	0.170383	ENSBTAG00000019686	NCKAP1L
GO:0046637	regulation of alpha-beta T cell differentiation	1	43	0.0175291	0.170383	ENSBTAG00000019686	NCKAP1L
GO:0002260	lymphocyte homeostasis	1	49	0.019954	0.180455	ENSBTAG00000019686	NCKAP1L
GO:0030865	cortical cytoskeleton organization	1	50	0.0203576	0.180455	ENSBTAG00000019686	NCKAP1L
GO:0006911	phagocytosis, engulfment	1	54	0.0219708	0.1841	ENSBTAG00000019686	NCKAP1L
GO:0043367	CD4-positive, alpha-beta T cell differentiation	1	56	0.0227765	0.18485	ENSBTAG00000019686	NCKAP1L
GO:0033627	cell adhesion mediated by integrin	1	57	0.0231791	0.18485	ENSBTAG00000019686	NCKAP1L
GO:0050764	regulation of phagocytosis	1	58	0.0235816	0.18485	ENSBTAG00000019686	NCKAP1L
GO:0010324	membrane invagination	1	64	0.0259937	0.186632	ENSBTAG00000019686	NCKAP1L
GO:0030593	neutrophil chemotaxis	1	66	0.0267966	0.186632	ENSBTAG00000019686	NCKAP1L
GO:0045582	positive regulation of T cell differentiation	1	66	0.0267966	0.186632	ENSBTAG00000019686	NCKAP1L
GO:0001776	leukocyte homeostasis	1	67	0.0271978	0.186632	ENSBTAG00000019686	NCKAP1L
GO:0046634	regulation of alpha-beta T cell activation	1	68	0.0275989	0.186632	ENSBTAG00000019686	NCKAP1L
GO:0042102	positive regulation of T cell proliferation	1	69	0.0279998	0.186632	ENSBTAG00000019686	NCKAP1L
GO:0002690	positive regulation of leukocyte chemotaxis	1	71	0.0288013	0.186632	ENSBTAG00000019686	NCKAP1L
GO:0035710	CD4-positive, alpha-beta T cell activation	1	71	0.0288013	0.186632	ENSBTAG00000019686	NCKAP1L
GO:0045639	positive regulation of myeloid cell differentiation	1	71	0.0288013	0.186632	ENSBTAG00000019686	NCKAP1L
GO:0045621	positive regulation of lymphocyte differentiation	1	75	0.0304025	0.194172	ENSBTAG00000019686	NCKAP1L
GO:0046632	alpha-beta T cell differentiation	1	79	0.0320014	0.194172	ENSBTAG00000019686	NCKAP1L
GO:0050871	positive regulation of B cell activation	1	80	0.0324008	0.194172	ENSBTAG00000019686	NCKAP1L
GO:1990266	neutrophil migration	1	81	0.0328001	0.194172	ENSBTAG00000019686	NCKAP1L
GO:0030838	positive regulation of actin filament polymerization	1	84	0.033997	0.194172	ENSBTAG00000019686	NCKAP1L
GO:0071621	granulocyte chemotaxis	1	85	0.0343956	0.194172	ENSBTAG00000019686	NCKAP1L
GO:0002688	regulation of leukocyte chemotaxis	1	92	0.0371825	0.194172	ENSBTAG00000019686	NCKAP1L
GO:0045807	positive regulation of endocytosis	1	93	0.03758	0.194172	ENSBTAG00000019686	NCKAP1L
GO:0030218	erythrocyte differentiation	1	94	0.0379774	0.194172	ENSBTAG00000019686	NCKAP1L
GO:0050671	positive regulation of lymphocyte proliferation	1	94	0.0379774	0.194172	ENSBTAG00000019686	NCKAP1L
GO:0032946	positive regulation of mononuclear cell proliferation	1	95	0.0383747	0.194172	ENSBTAG00000019686	NCKAP1L
GO:0032635	interleukin-6 production	1	98	0.0395657	0.194172	ENSBTAG00000019686	NCKAP1L
GO:0032675	regulation of interleukin-6 production	1	98	0.0395657	0.194172	ENSBTAG00000019686	NCKAP1L
GO:0070665	positive regulation of leukocyte proliferation	1	99	0.0399624	0.194172	ENSBTAG00000019686	NCKAP1L
GO:0002687	positive regulation of leukocyte migration	1	101	0.0407554	0.194172	ENSBTAG00000019686	NCKAP1L
GO:0034101	erythrocyte homeostasis	1	101	0.0407554	0.194172	ENSBTAG00000019686	NCKAP1L
GO:0097530	granulocyte migration	1	102	0.0411517	0.194172	ENSBTAG00000019686	NCKAP1L
GO:0050921	positive regulation of chemotaxis	1	105	0.0423397	0.195972	ENSBTAG00000019686	NCKAP1L
GO:0032273	positive regulation of protein polymerization	1	108	0.0435265	0.199091	ENSBTAG00000019686	NCKAP1L
GO:0045580	regulation of T cell differentiation	1	109	0.0439218	0.199091	ENSBTAG00000019686	NCKAP1L
GO:0046631	alpha-beta T cell activation	1	111	0.044712	0.199091	ENSBTAG00000019686	NCKAP1L
GO:0030183	B cell differentiation	1	112	0.0451068	0.199091	ENSBTAG00000019686	NCKAP1L
GO:0048520	positive regulation of behavior	1	112	0.0451068	0.199091	ENSBTAG00000019686	NCKAP1L
GO:1902107	positive regulation of leukocyte differentiation	1	114	0.0458962	0.199091	ENSBTAG00000019686	NCKAP1L
GO:0050864	regulation of B cell activation	1	115	0.0462907	0.199091	ENSBTAG00000019686	NCKAP1L
GO:0002262	myeloid cell homeostasis	1	121	0.0486545	0.207422	ENSBTAG00000019686	NCKAP1L
GO:0042129	regulation of T cell proliferation	1	126	0.0506206	0.213927	ENSBTAG00000019686	NCKAP1L
GO:0045619	regulation of lymphocyte differentiation	1	129	0.0517985	0.214921	ENSBTAG00000019686	NCKAP1L
GO:0045637	regulation of myeloid cell differentiation	1	137	0.0549337	0.214921	ENSBTAG00000019686	NCKAP1L
GO:0050870	positive regulation of T cell activation	1	143	0.0572791	0.214921	ENSBTAG00000019686	NCKAP1L
GO:0032846	positive regulation of homeostatic process	1	144	0.0576696	0.214921	ENSBTAG00000019686	NCKAP1L
GO:0097529	myeloid leukocyte migration	1	145	0.0580599	0.214921	ENSBTAG00000019686	NCKAP1L
GO:1903708	positive regulation of hemopoiesis	1	146	0.05845	0.214921	ENSBTAG00000019686	NCKAP1L
GO:0042098	T cell proliferation	1	147	0.05884	0.214921	ENSBTAG00000019686	NCKAP1L
GO:0030833	regulation of actin filament polymerization	1	148	0.0592299	0.214921	ENSBTAG00000019686	NCKAP1L
GO:0034112	positive regulation of homotypic cell-cell adhesion	1	151	0.0603987	0.214921	ENSBTAG00000019686	NCKAP1L
GO:0002685	regulation of leukocyte migration	1	153	0.0611772	0.214921	ENSBTAG00000019686	NCKAP1L
GO:1903039	positive regulation of leukocyte cell-cell adhesion	1	156	0.0623439	0.214921	ENSBTAG00000019686	NCKAP1L
GO:0030041	actin filament polymerization	1	160	0.0638976	0.214921	ENSBTAG00000019686	NCKAP1L
GO:0008064	regulation of actin polymerization or depolymerization	1	161	0.0642857	0.214921	ENSBTAG00000019686	NCKAP1L
GO:0030100	regulation of endocytosis	1	161	0.0642857	0.214921	ENSBTAG00000019686	NCKAP1L
GO:0030832	regulation of actin filament length	1	161	0.0642857	0.214921	ENSBTAG00000019686	NCKAP1L
GO:0006909	phagocytosis	1	162	0.0646737	0.214921	ENSBTAG00000019686	NCKAP1L
GO:0050670	regulation of lymphocyte proliferation	1	162	0.0646737	0.214921	ENSBTAG00000019686	NCKAP1L
GO:0030595	leukocyte chemotaxis	1	164	0.0654491	0.214921	ENSBTAG00000019686	NCKAP1L
GO:0032944	regulation of mononuclear cell proliferation	1	164	0.0654491	0.214921	ENSBTAG00000019686	NCKAP1L
GO:0050920	regulation of chemotaxis	1	169	0.0673854	0.219582	ENSBTAG00000019686	NCKAP1L
GO:0070663	regulation of leukocyte proliferation	1	170	0.0677722	0.219582	ENSBTAG00000019686	NCKAP1L
GO:0001818	negative regulation of cytokine production	1	177	0.0704762	0.226831	ENSBTAG00000019686	NCKAP1L
GO:0022409	positive regulation of cell-cell adhesion	1	181	0.0720184	0.228228	ENSBTAG00000019686	NCKAP1L
GO:0051495	positive regulation of cytoskeleton organization	1	181	0.0720184	0.228228	ENSBTAG00000019686	NCKAP1L
GO:0008154	actin polymerization or depolymerization	1	183	0.0727886	0.228228	ENSBTAG00000019686	NCKAP1L
GO:0032271	regulation of protein polymerization	1	188	0.0747119	0.232756	ENSBTAG00000019686	NCKAP1L
GO:0031334	positive regulation of protein complex assembly	1	192	0.076248	0.235039	ENSBTAG00000019686	NCKAP1L
GO:0050795	regulation of behavior	1	195	0.0773986	0.235039	ENSBTAG00000019686	NCKAP1L
GO:0032147	activation of protein kinase activity	1	196	0.0777819	0.235039	ENSBTAG00000019686	NCKAP1L
GO:0030217	T cell differentiation	1	197	0.078165	0.235039	ENSBTAG00000019686	NCKAP1L
GO:1902105	regulation of leukocyte differentiation	1	200	0.0793136	0.235039	ENSBTAG00000019686	NCKAP1L
GO:0051251	positive regulation of lymphocyte activation	1	211	0.0835147	0.243043	ENSBTAG00000019686	NCKAP1L
GO:0048872	homeostasis of number of cells	1	218	0.0861795	0.249305	ENSBTAG00000019686	NCKAP1L
GO:0042113	B cell activation	1	223	0.0880789	0.251697	ENSBTAG00000019686	NCKAP1L
GO:0046651	lymphocyte proliferation	1	224	0.0884584	0.251697	ENSBTAG00000019686	NCKAP1L
GO:0032943	mononuclear cell proliferation	1	226	0.0892169	0.251697	ENSBTAG00000019686	NCKAP1L
GO:0051258	protein polymerization	1	237	0.0933792	0.254002	ENSBTAG00000019686	NCKAP1L
GO:0050863	regulation of T cell activation	1	238	0.0937568	0.254002	ENSBTAG00000019686	NCKAP1L
GO:0070661	leukocyte proliferation	1	240	0.0945115	0.254002	ENSBTAG00000019686	NCKAP1L
GO:0002696	positive regulation of leukocyte activation	1	242	0.0952657	0.254002	ENSBTAG00000019686	NCKAP1L
GO:0060326	cell chemotaxis	1	246	0.0967725	0.255606	ENSBTAG00000019686	NCKAP1L
GO:0032103	positive regulation of response to external stimulus	1	251	0.098653	0.256392	ENSBTAG00000019686	NCKAP1L
GO:0050867	positive regulation of cell activation	1	251	0.098653	0.256392	ENSBTAG00000019686	NCKAP1L
GO:0034110	regulation of homotypic cell-cell adhesion	1	260	0.102029	0.260694	ENSBTAG00000019686	NCKAP1L
GO:0050900	leukocyte migration	1	263	0.103153	0.260694	ENSBTAG00000019686	NCKAP1L
GO:1903037	regulation of leukocyte cell-cell adhesion	1	263	0.103153	0.260694	ENSBTAG00000019686	NCKAP1L
GO:1903706	regulation of hemopoiesis	1	274	0.10726	0.268703	ENSBTAG00000019686	NCKAP1L
GO:0030031	cell projection assembly	1	278	0.10875	0.269204	ENSBTAG00000019686	NCKAP1L
GO:0030099	myeloid cell differentiation	1	279	0.109122	0.269204	ENSBTAG00000019686	NCKAP1L
GO:0032956	regulation of actin cytoskeleton organization	1	283	0.110609	0.271495	ENSBTAG00000019686	NCKAP1L
GO:0043547	positive regulation of GTPase activity	1	293	0.114317	0.275805	ENSBTAG00000019686	NCKAP1L
GO:0030098	lymphocyte differentiation	1	294	0.114687	0.275805	ENSBTAG00000019686	NCKAP1L
GO:0032535	regulation of cellular component size	1	297	0.115797	0.275805	ENSBTAG00000019686	NCKAP1L
GO:0032844	regulation of homeostatic process	1	299	0.116536	0.275805	ENSBTAG00000019686	NCKAP1L
GO:0045785	positive regulation of cell adhesion	1	300	0.116905	0.275805	ENSBTAG00000019686	NCKAP1L
GO:0032970	regulation of actin filament-based process	1	307	0.119486	0.280533	ENSBTAG00000019686	NCKAP1L
GO:0022407	regulation of cell-cell adhesion	1	337	0.130476	0.300528	ENSBTAG00000019686	NCKAP1L
GO:0051249	regulation of lymphocyte activation	1	340	0.131569	0.301615	ENSBTAG00000019686	NCKAP1L
GO:0045860	positive regulation of protein kinase activity	1	347	0.134113	0.304204	ENSBTAG00000019686	NCKAP1L
GO:0043087	regulation of GTPase activity	1	350	0.135202	0.304204	ENSBTAG00000019686	NCKAP1L
GO:0060627	regulation of vesicle-mediated transport	1	353	0.136289	0.304861	ENSBTAG00000019686	NCKAP1L
GO:0043254	regulation of protein complex assembly	1	356	0.137376	0.304861	ENSBTAG00000019686	NCKAP1L
GO:0090066	regulation of anatomical structure size	1	368	0.141709	0.308787	ENSBTAG00000019686	NCKAP1L
GO:0007015	actin filament organization	1	369	0.142069	0.308787	ENSBTAG00000019686	NCKAP1L
GO:0042110	T cell activation	1	372	0.143149	0.308787	ENSBTAG00000019686	NCKAP1L
GO:0070489	T cell aggregation	1	372	0.143149	0.308787	ENSBTAG00000019686	NCKAP1L
GO:0071593	lymphocyte aggregation	1	374	0.143868	0.308787	ENSBTAG00000019686	NCKAP1L
GO:0070486	leukocyte aggregation	1	380	0.146023	0.309481	ENSBTAG00000019686	NCKAP1L
GO:0030335	positive regulation of cell migration	1	382	0.146741	0.309481	ENSBTAG00000019686	NCKAP1L
GO:0044089	positive regulation of cellular component biogenesis	1	397	0.152104	0.315908	ENSBTAG00000019686	NCKAP1L
GO:2000147	positive regulation of cell motility	1	397	0.152104	0.315908	ENSBTAG00000019686	NCKAP1L
GO:0002694	regulation of leukocyte activation	1	400	0.153173	0.316775	ENSBTAG00000019686	NCKAP1L
GO:0051272	positive regulation of cellular component movement	1	403	0.154241	0.317632	ENSBTAG00000019686	NCKAP1L
GO:0033674	positive regulation of kinase activity	1	408	0.156018	0.319937	ENSBTAG00000019686	NCKAP1L
GO:0040017	positive regulation of locomotion	1	415	0.158501	0.323029	ENSBTAG00000019686	NCKAP1L
GO:0002521	leukocyte differentiation	1	416	0.158856	0.323029	ENSBTAG00000019686	NCKAP1L
GO:0007159	leukocyte cell-cell adhesion	1	422	0.160978	0.324628	ENSBTAG00000019686	NCKAP1L
GO:0034109	homotypic cell-cell adhesion	1	425	0.162038	0.325415	ENSBTAG00000019686	NCKAP1L
GO:0050865	regulation of cell activation	1	427	0.162744	0.325487	ENSBTAG00000019686	NCKAP1L
GO:0048812	neuron projection morphogenesis	1	433	0.164858	0.328364	ENSBTAG00000019686	NCKAP1L
GO:0051493	regulation of cytoskeleton organization	1	450	0.170823	0.336113	ENSBTAG00000019686	NCKAP1L
GO:0051347	positive regulation of transferase activity	1	464	0.175708	0.340216	ENSBTAG00000019686	NCKAP1L
GO:0006935	chemotaxis	1	473	0.178836	0.344897	ENSBTAG00000019686	NCKAP1L
GO:0042330	taxis	1	476	0.179876	0.345532	ENSBTAG00000019686	NCKAP1L
GO:0010638	positive regulation of organelle organization	1	483	0.182298	0.347439	ENSBTAG00000019686	NCKAP1L
GO:0006897	endocytosis	1	497	0.187126	0.354012	ENSBTAG00000019686	NCKAP1L
GO:0001817	regulation of cytokine production	1	508	0.190901	0.358216	ENSBTAG00000019686	NCKAP1L
GO:0001816	cytokine production	1	514	0.192954	0.35919	ENSBTAG00000019686	NCKAP1L
GO:0051345	positive regulation of hydrolase activity	1	516	0.193638	0.35919	ENSBTAG00000019686	NCKAP1L
GO:0046649	lymphocyte activation	1	542	0.202476	0.367064	ENSBTAG00000019686	NCKAP1L
GO:0051050	positive regulation of transport	1	542	0.202476	0.367064	ENSBTAG00000019686	NCKAP1L
GO:0030155	regulation of cell adhesion	1	547	0.204166	0.367064	ENSBTAG00000019686	NCKAP1L
GO:0016337	single organismal cell-cell adhesion	1	550	0.205179	0.367064	ENSBTAG00000019686	NCKAP1L
GO:0045859	regulation of protein kinase activity	1	552	0.205853	0.367064	ENSBTAG00000019686	NCKAP1L
GO:0030036	actin cytoskeleton organization	1	569	0.211567	0.372541	ENSBTAG00000019686	NCKAP1L
GO:0098602	single organism cell adhesion	1	612	0.225861	0.39203	ENSBTAG00000019686	NCKAP1L
GO:0008284	positive regulation of cell proliferation	1	623	0.229482	0.393828	ENSBTAG00000019686	NCKAP1L
GO:0030029	actin filament-based process	1	623	0.229482	0.393828	ENSBTAG00000019686	NCKAP1L
GO:0031175	neuron projection development	1	624	0.22981	0.393828	ENSBTAG00000019686	NCKAP1L
GO:0030097	hemopoiesis	1	636	0.233742	0.395821	ENSBTAG00000019686	NCKAP1L
GO:0043549	regulation of kinase activity	1	637	0.234069	0.395821	ENSBTAG00000019686	NCKAP1L
GO:0032101	regulation of response to external stimulus	1	639	0.234722	0.395821	ENSBTAG00000019686	NCKAP1L
GO:0045321	leukocyte activation	1	641	0.235375	0.395821	ENSBTAG00000019686	NCKAP1L
GO:0045597	positive regulation of cell differentiation	1	658	0.240906	0.399591	ENSBTAG00000019686	NCKAP1L
GO:0030334	regulation of cell migration	1	663	0.242526	0.40091	ENSBTAG00000019686	NCKAP1L
GO:0048534	hematopoietic or lymphoid organ development	1	672	0.245435	0.402977	ENSBTAG00000019686	NCKAP1L
GO:2000145	regulation of cell motility	1	702	0.255061	0.411827	ENSBTAG00000019686	NCKAP1L
GO:0048858	cell projection morphogenesis	1	710	0.257611	0.414538	ENSBTAG00000019686	NCKAP1L
GO:0001775	cell activation	1	718	0.260153	0.414538	ENSBTAG00000019686	NCKAP1L
GO:0002684	positive regulation of immune system process	1	718	0.260153	0.414538	ENSBTAG00000019686	NCKAP1L
GO:0044087	regulation of cellular component biogenesis	1	718	0.260153	0.414538	ENSBTAG00000019686	NCKAP1L
GO:0002520	immune system development	1	722	0.261421	0.415198	ENSBTAG00000019686	NCKAP1L
GO:0032990	cell part morphogenesis	1	725	0.262371	0.415349	ENSBTAG00000019686	NCKAP1L
GO:0051338	regulation of transferase activity	1	734	0.265214	0.415787	ENSBTAG00000019686	NCKAP1L
GO:0001934	positive regulation of protein phosphorylation	1	745	0.268676	0.419614	ENSBTAG00000019686	NCKAP1L
GO:0098609	cell-cell adhesion	1	748	0.269618	0.419614	ENSBTAG00000019686	NCKAP1L
GO:0051270	regulation of cellular component movement	1	750	0.270245	0.419614	ENSBTAG00000019686	NCKAP1L
GO:0048666	neuron development	1	769	0.276182	0.42659	ENSBTAG00000019686	NCKAP1L
GO:0040012	regulation of locomotion	1	779	0.27929	0.428661	ENSBTAG00000019686	NCKAP1L
GO:0042327	positive regulation of phosphorylation	1	793	0.283622	0.433459	ENSBTAG00000019686	NCKAP1L
GO:0051241	negative regulation of multicellular organismal process	1	802	0.286394	0.436325	ENSBTAG00000019686	NCKAP1L
GO:0061024	membrane organization	1	831	0.295267	0.441997	ENSBTAG00000019686	NCKAP1L
GO:0010562	positive regulation of phosphorus metabolic process	1	842	0.298607	0.441997	ENSBTAG00000019686	NCKAP1L
GO:0045937	positive regulation of phosphate metabolic process	1	842	0.298607	0.441997	ENSBTAG00000019686	NCKAP1L
GO:0031401	positive regulation of protein modification process	1	933	0.325726	0.466971	ENSBTAG00000019686	NCKAP1L
GO:0051336	regulation of hydrolase activity	1	942	0.328359	0.467101	ENSBTAG00000019686	NCKAP1L
GO:0030182	neuron differentiation	1	956	0.332437	0.467101	ENSBTAG00000019686	NCKAP1L
GO:0051130	positive regulation of cellular component organization	1	958	0.333017	0.467101	ENSBTAG00000019686	NCKAP1L
GO:0043085	positive regulation of catalytic activity	1	963	0.334467	0.467101	ENSBTAG00000019686	NCKAP1L
GO:0051094	positive regulation of developmental process	1	989	0.341964	0.473418	ENSBTAG00000019686	NCKAP1L
GO:0033043	regulation of organelle organization	1	1004	0.346256	0.476715	ENSBTAG00000019686	NCKAP1L
GO:0002682	regulation of immune system process	1	1012	0.348536	0.47715	ENSBTAG00000019686	NCKAP1L
GO:0048699	generation of neurons	1	1081	0.367913	0.500857	ENSBTAG00000019686	NCKAP1L
GO:0001932	regulation of protein phosphorylation	1	1086	0.369298	0.501337	ENSBTAG00000019686	NCKAP1L
GO:0000902	cell morphogenesis	1	1095	0.371784	0.501908	ENSBTAG00000019686	NCKAP1L
GO:0030030	cell projection organization	1	1095	0.371784	0.501908	ENSBTAG00000019686	NCKAP1L
GO:0016192	vesicle-mediated transport	1	1099	0.372886	0.502002	ENSBTAG00000019686	NCKAP1L
GO:0042127	regulation of cell proliferation	1	1111	0.376183	0.505041	ENSBTAG00000019686	NCKAP1L
GO:0051049	regulation of transport	1	1119	0.378372	0.505919	ENSBTAG00000019686	NCKAP1L
GO:0016477	cell migration	1	1121	0.378919	0.505919	ENSBTAG00000019686	NCKAP1L
GO:0007155	cell adhesion	1	1136	0.383003	0.507192	ENSBTAG00000019686	NCKAP1L
GO:0022610	biological adhesion	1	1141	0.38436	0.507605	ENSBTAG00000019686	NCKAP1L
GO:0022008	neurogenesis	1	1166	0.391103	0.510287	ENSBTAG00000019686	NCKAP1L
GO:0032989	cellular component morphogenesis	1	1166	0.391103	0.510287	ENSBTAG00000019686	NCKAP1L
GO:0032270	positive regulation of cellular protein metabolic process	1	1192	0.398049	0.516559	ENSBTAG00000019686	NCKAP1L
GO:0042325	regulation of phosphorylation	1	1197	0.399377	0.516559	ENSBTAG00000019686	NCKAP1L
GO:0051240	positive regulation of multicellular organismal process	1	1198	0.399643	0.516559	ENSBTAG00000019686	NCKAP1L
GO:0044093	positive regulation of molecular function	1	1220	0.405454	0.520971	ENSBTAG00000019686	NCKAP1L
GO:0048870	cell motility	1	1233	0.408865	0.520971	ENSBTAG00000019686	NCKAP1L
GO:0051674	localization of cell	1	1233	0.408865	0.520971	ENSBTAG00000019686	NCKAP1L
GO:0045595	regulation of cell differentiation	1	1259	0.415637	0.520971	ENSBTAG00000019686	NCKAP1L
GO:0051247	positive regulation of protein metabolic process	1	1262	0.416414	0.520971	ENSBTAG00000019686	NCKAP1L
GO:0042592	homeostatic process	1	1286	0.422599	0.525276	ENSBTAG00000019686	NCKAP1L
GO:0008283	cell proliferation	1	1355	0.440068	0.540415	ENSBTAG00000019686	NCKAP1L
GO:0019220	regulation of phosphate metabolic process	1	1361	0.441565	0.540415	ENSBTAG00000019686	NCKAP1L
GO:0051174	regulation of phosphorus metabolic process	1	1365	0.442562	0.540415	ENSBTAG00000019686	NCKAP1L
GO:2000026	regulation of multicellular organismal development	1	1425	0.457326	0.554265	ENSBTAG00000019686	NCKAP1L
GO:0040011	locomotion	1	1437	0.460238	0.556407	ENSBTAG00000019686	NCKAP1L
GO:0031399	regulation of protein modification process	1	1497	0.474599	0.569518	ENSBTAG00000019686	NCKAP1L
GO:0006468	protein phosphorylation	1	1522	0.480485	0.573749	ENSBTAG00000019686	NCKAP1L
GO:0006928	movement of cell or subcellular component	1	1563	0.490016	0.579435	ENSBTAG00000019686	NCKAP1L
GO:0007399	nervous system development	1	1580	0.493924	0.582638	ENSBTAG00000019686	NCKAP1L
GO:0048468	cell development	1	1642	0.507959	0.596171	ENSBTAG00000019686	NCKAP1L
GO:0048584	positive regulation of response to stimulus	1	1644	0.508406	0.596171	ENSBTAG00000019686	NCKAP1L
GO:0009605	response to external stimulus	1	1734	0.52817	0.617045	ENSBTAG00000019686	NCKAP1L
GO:0050790	regulation of catalytic activity	1	1812	0.544744	0.631851	ENSBTAG00000019686	NCKAP1L
GO:0016310	phosphorylation	1	1849	0.55243	0.637722	ENSBTAG00000019686	NCKAP1L
GO:0050793	regulation of developmental process	1	1893	0.561425	0.645042	ENSBTAG00000019686	NCKAP1L
GO:0002376	immune system process	1	1905	0.563851	0.646301	ENSBTAG00000019686	NCKAP1L
GO:0051128	regulation of cellular component organization	1	1924	0.567669	0.649146	ENSBTAG00000019686	NCKAP1L
GO:0032879	regulation of localization	1	1932	0.569268	0.649446	ENSBTAG00000019686	NCKAP1L
GO:0070887	cellular response to chemical stimulus	1	2063	0.594738	0.675333	ENSBTAG00000019686	NCKAP1L
GO:0032268	regulation of cellular protein metabolic process	1	2094	0.600573	0.680369	ENSBTAG00000019686	NCKAP1L
GO:0051239	regulation of multicellular organismal process	1	2160	0.612756	0.68935	ENSBTAG00000019686	NCKAP1L
GO:0009653	anatomical structure morphogenesis	1	2225	0.624441	0.697434	ENSBTAG00000019686	NCKAP1L
GO:0051246	regulation of protein metabolic process	1	2232	0.625681	0.697434	ENSBTAG00000019686	NCKAP1L
GO:0065009	regulation of molecular function	1	2288	0.635477	0.706732	ENSBTAG00000019686	NCKAP1L
GO:0048513	animal organ development	1	2413	0.656554	0.72062	ENSBTAG00000019686	NCKAP1L
GO:0031325	positive regulation of cellular metabolic process	1	2654	0.694255	0.757006	ENSBTAG00000019686	NCKAP1L
GO:0010604	positive regulation of macromolecule metabolic process	1	2657	0.694701	0.757006	ENSBTAG00000019686	NCKAP1L
GO:0065008	regulation of biological quality	1	2792	0.714201	0.776514	ENSBTAG00000019686	NCKAP1L
GO:0030154	cell differentiation	1	2837	0.72046	0.778443	ENSBTAG00000019686	NCKAP1L
GO:0048583	regulation of response to stimulus	1	2924	0.732226	0.787305	ENSBTAG00000019686	NCKAP1L
GO:0009893	positive regulation of metabolic process	1	3099	0.754614	0.8025	ENSBTAG00000019686	NCKAP1L
GO:0048869	cellular developmental process	1	3142	0.759863	0.806317	ENSBTAG00000019686	NCKAP1L
GO:0048731	system development	1	3331	0.781807	0.818876	ENSBTAG00000019686	NCKAP1L
GO:0007275	multicellular organism development	1	3643	0.814278	0.847407	ENSBTAG00000019686	NCKAP1L
GO:0042221	response to chemical	1	3751	0.824507	0.856219	ENSBTAG00000019686	NCKAP1L
GO:0048519	negative regulation of biological process	1	3974	0.844109	0.872845	ENSBTAG00000019686	NCKAP1L
GO:0048856	anatomical structure development	1	4126	0.856368	0.883046	ENSBTAG00000019686	NCKAP1L
GO:0048522	positive regulation of cellular process	1	4247	0.865526	0.888679	ENSBTAG00000019686	NCKAP1L
GO:0044767	single-organism developmental process	1	4423	0.877952	0.896396	ENSBTAG00000019686	NCKAP1L
GO:0032502	developmental process	1	4473	0.881297	0.897925	ENSBTAG00000019686	NCKAP1L
GO:0048518	positive regulation of biological process	1	4868	0.905073	0.920221	ENSBTAG00000019686	NCKAP1L
GO:0051716	cellular response to stimulus	1	6476	0.964785	0.974814	ENSBTAG00000019686	NCKAP1L
GO:0050896	response to stimulus	1	7535	0.983186	0.987249	ENSBTAG00000019686	NCKAP1L
GO:0007610	behavior	2	558	0.0201399	0.180455	ENSBTAG00000019686;ENSBTAG00000020179	NCKAP1L;AAAS
GO:0007010	cytoskeleton organization	2	1173	0.078834	0.235039	ENSBTAG00000019686;ENSBTAG00000020179	NCKAP1L;AAAS
GO:1902589	single-organism organelle organization	2	2267	0.236319	0.396038	ENSBTAG00000019686;ENSBTAG00000020179	NCKAP1L;AAAS
GO:0006996	organelle organization	2	3210	0.390947	0.510287	ENSBTAG00000019686;ENSBTAG00000020179	NCKAP1L;AAAS
GO:0044707	single-multicellular organism process	2	4450	0.582269	0.662723	ENSBTAG00000019686;ENSBTAG00000020179	NCKAP1L;AAAS
GO:0032501	multicellular organismal process	2	5964	0.766081	0.809382	ENSBTAG00000019686;ENSBTAG00000020179	NCKAP1L;AAAS
