# Supplementary material for: Genome-Wide Association Study of Age at First Calving in U.S. Holstein Cows
Source: Int J Mol Sci. 2023 Apr 12;24(8):7109. doi: 10.3390/ijms24087109 (PMC10138929; doi:10.3390/ijms24087109)
Supplement: Supplementary file 1 [file ijms-24-07109-s001.zip]

Archive with 6 entries (6 files):
- Supplementary_material.pdf
- Table_S2.xlsx
- Table_S3.xlsx
- Table_S4.xlsx
- Table_S5.xlsx
- Table_S6.xlsx
